# Supplementary material
Source: ML conference proceedings conference paper supplement (https://openreview.net/forum?id=X0Etmtge6w)

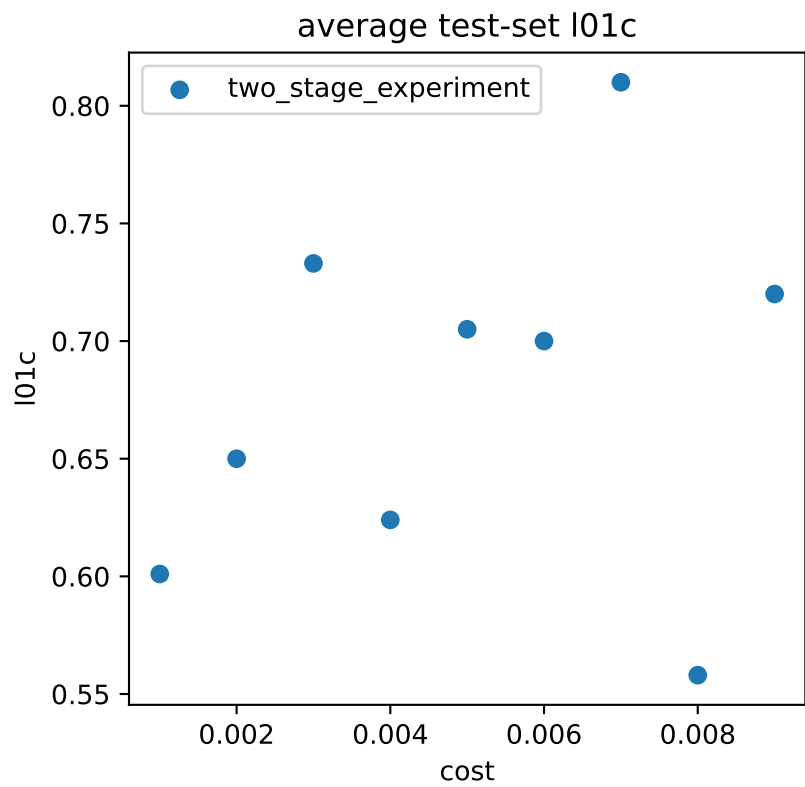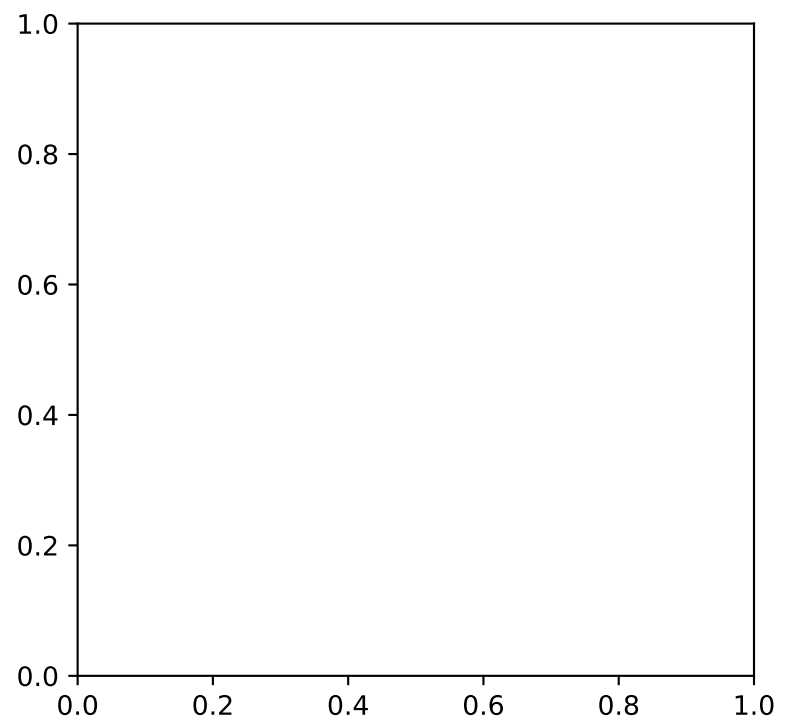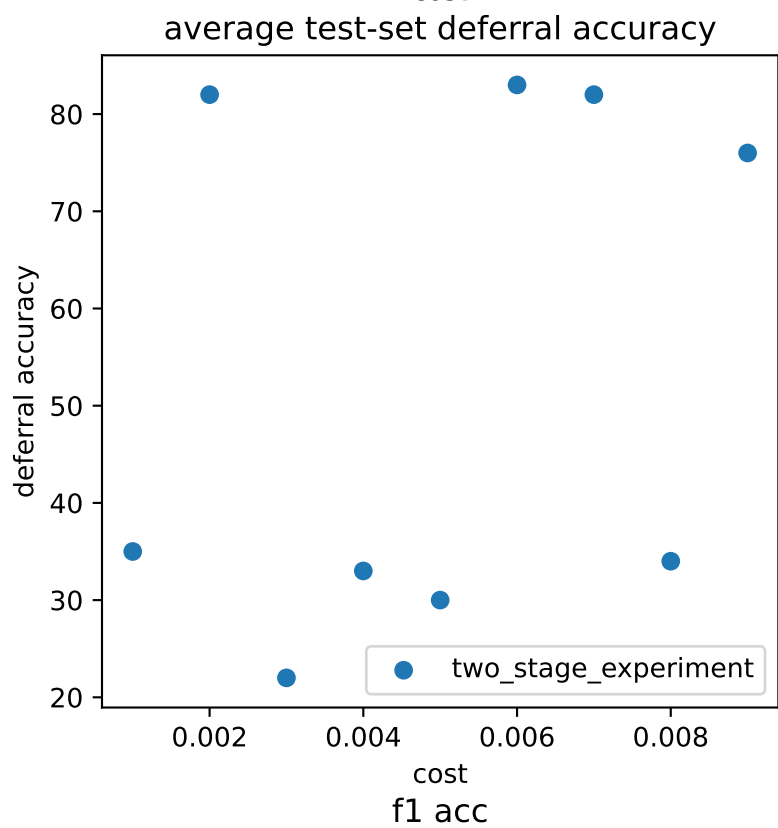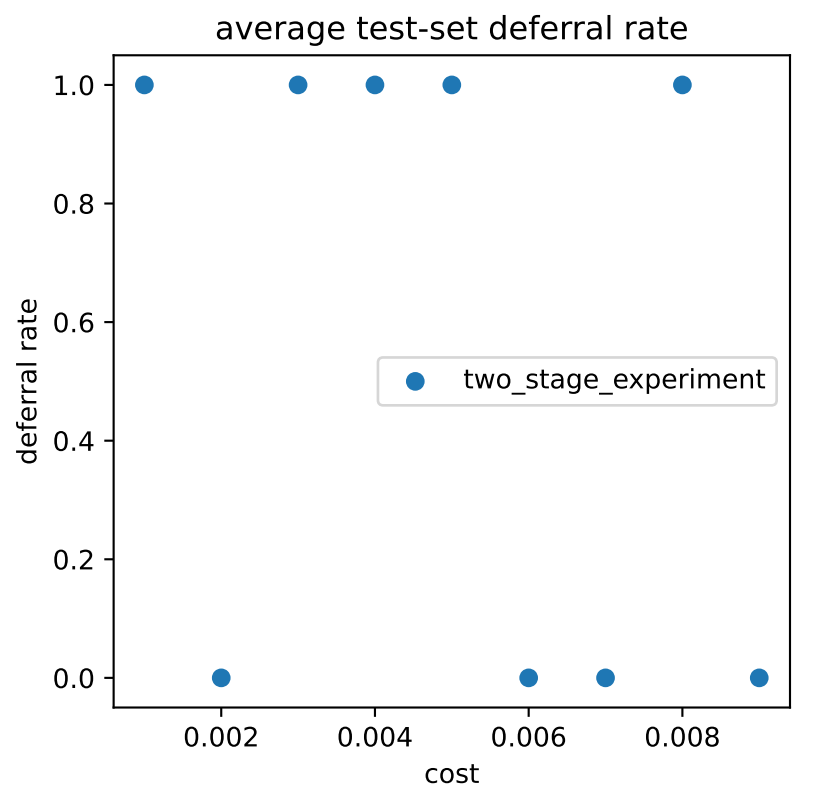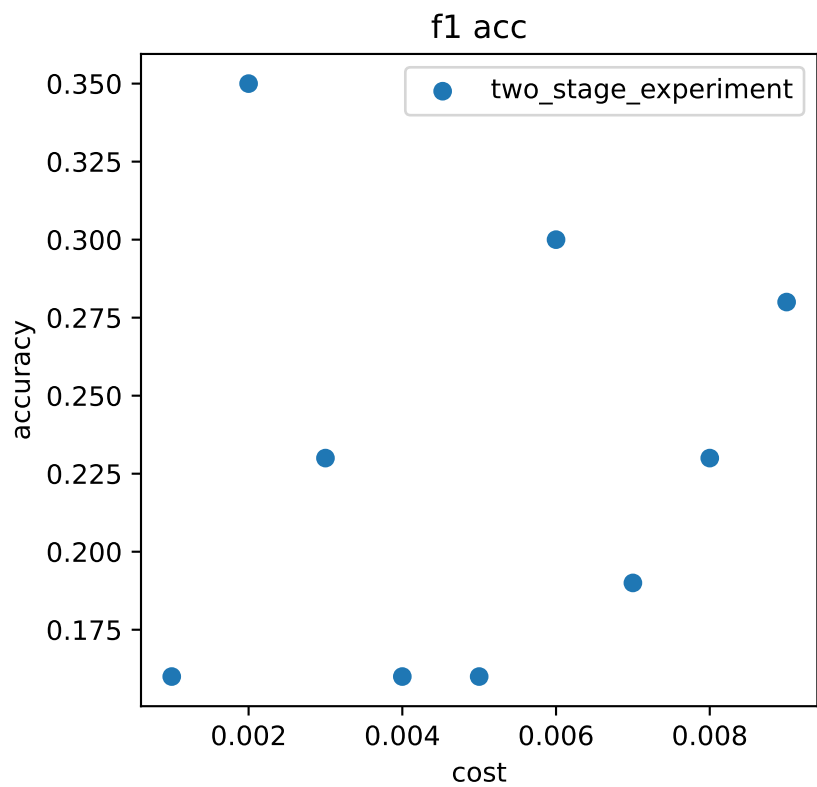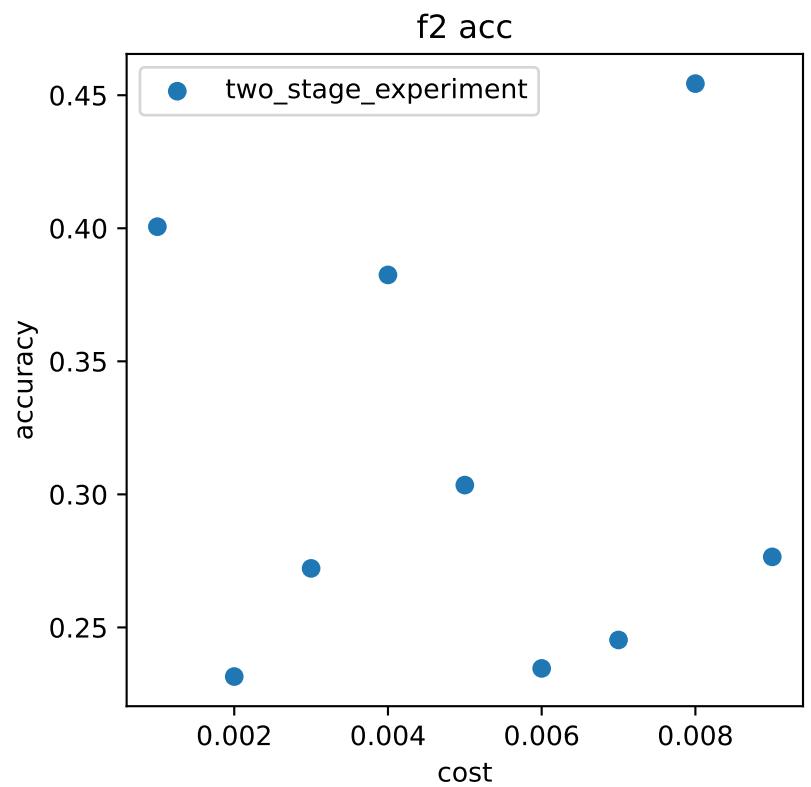

Supplement: supplementary_material [file costfig.pdf › home/joseph/flo/EE_synthetic/figures/costfig.pdf]

f1

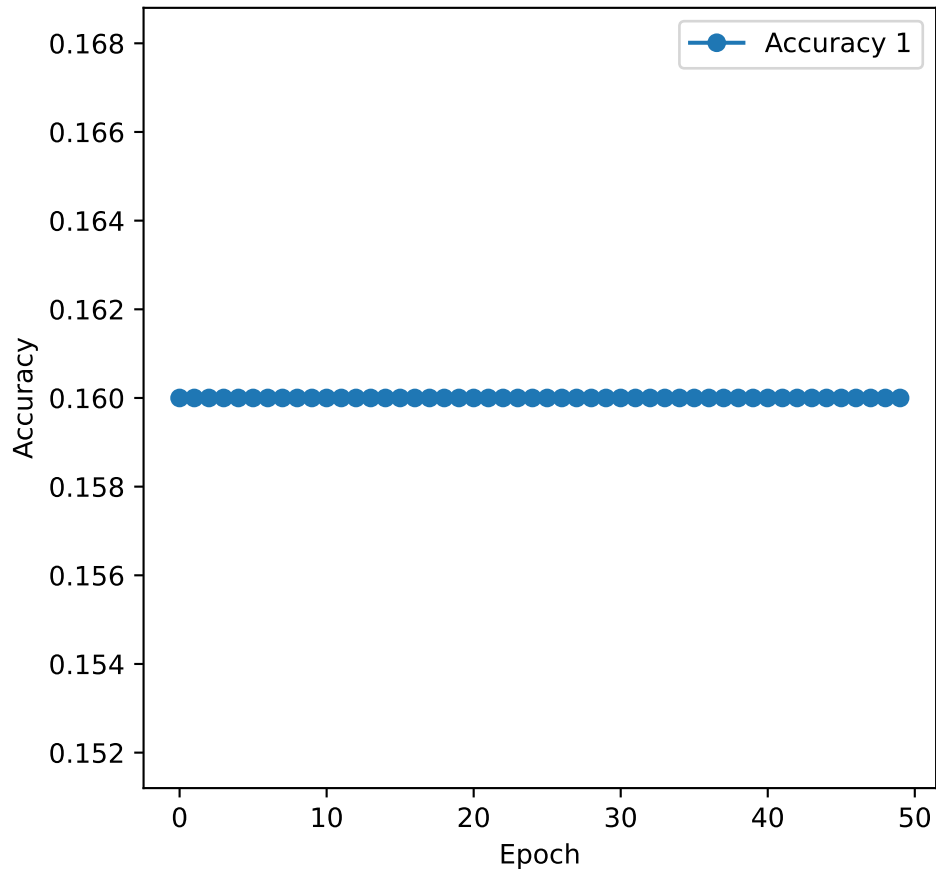

f2

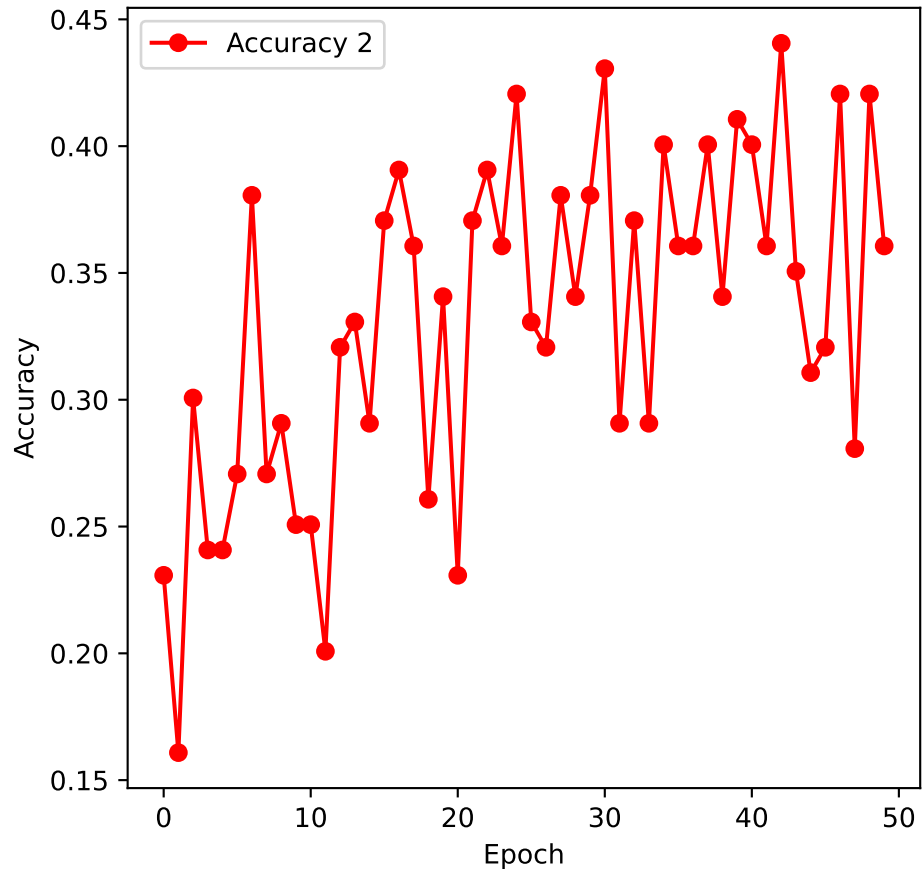

Supplement: supplementary_material [file llm_2s_exp0.001_acc.pdf › home/joseph/flo/EE_synthetic/figures/llm_2s_exp0.001_acc.pdf]

surrogate loss

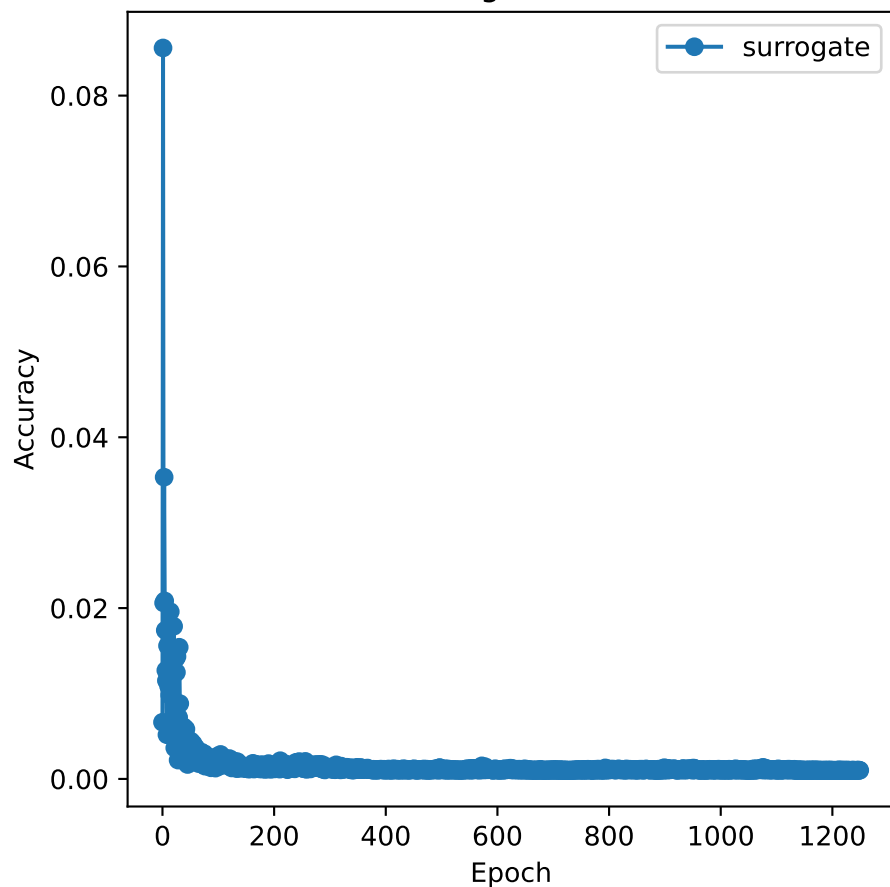

l01c on decision rule

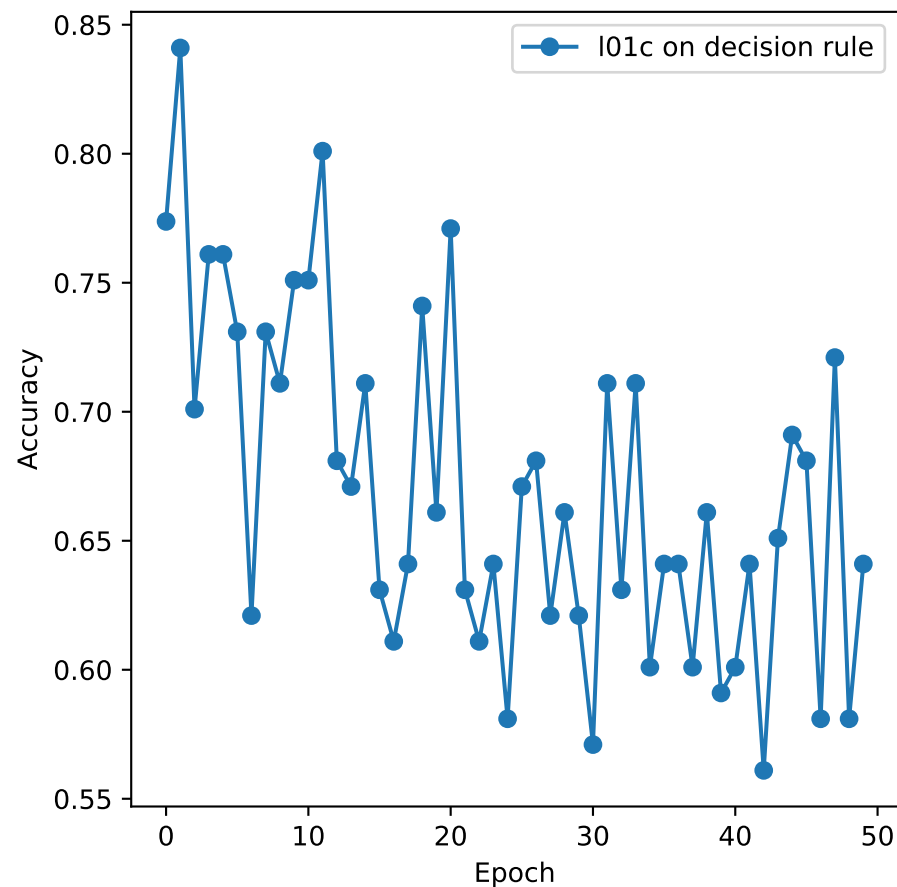

f1 loss

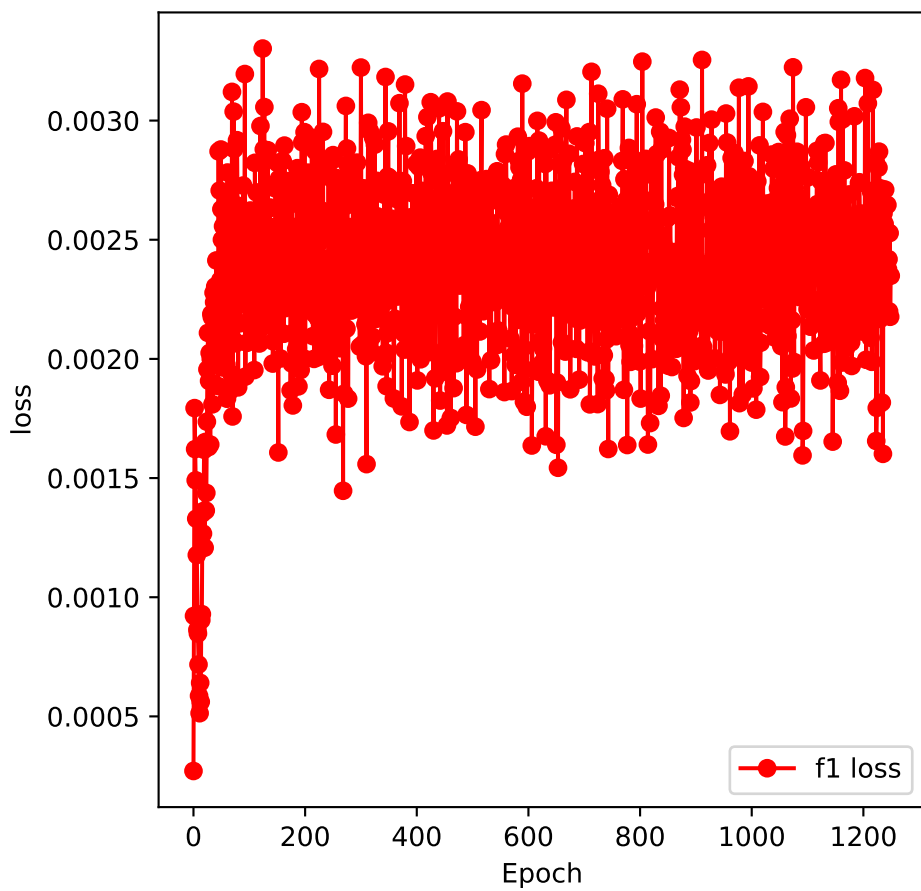

f2 loss

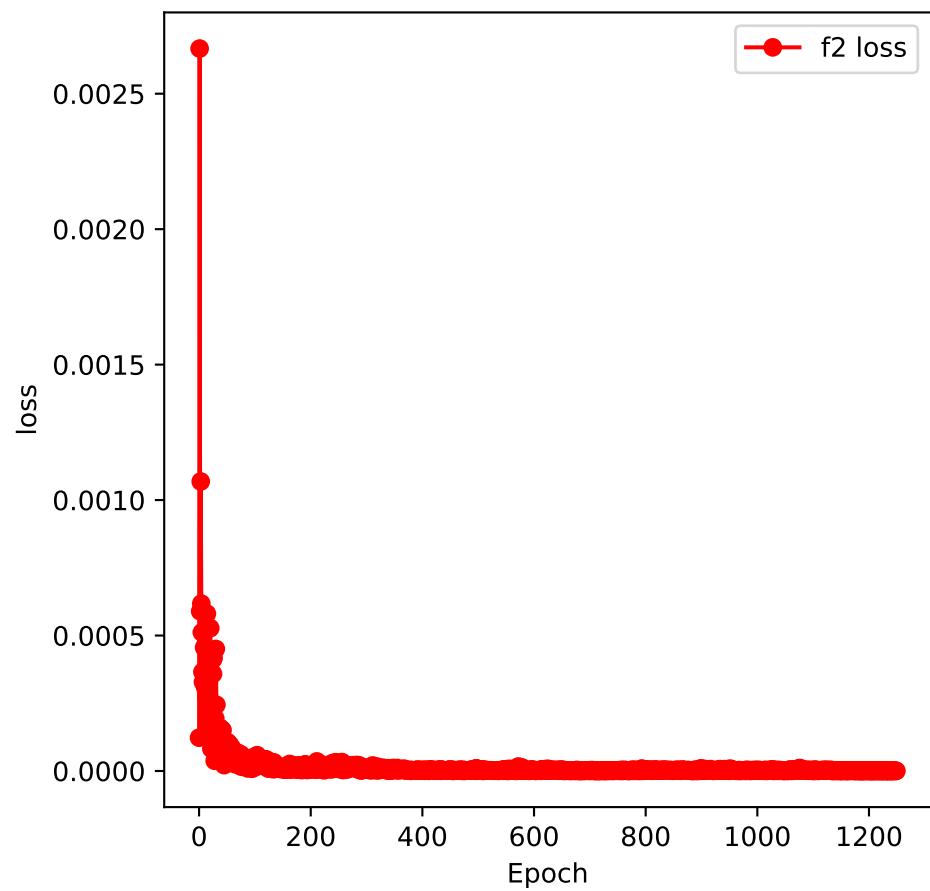

Supplement: supplementary_material [file llm_2s_exp0.001_losses.pdf › home/joseph/flo/EE_synthetic/figures/llm_2s_exp0.001_losses.pdf]

f1

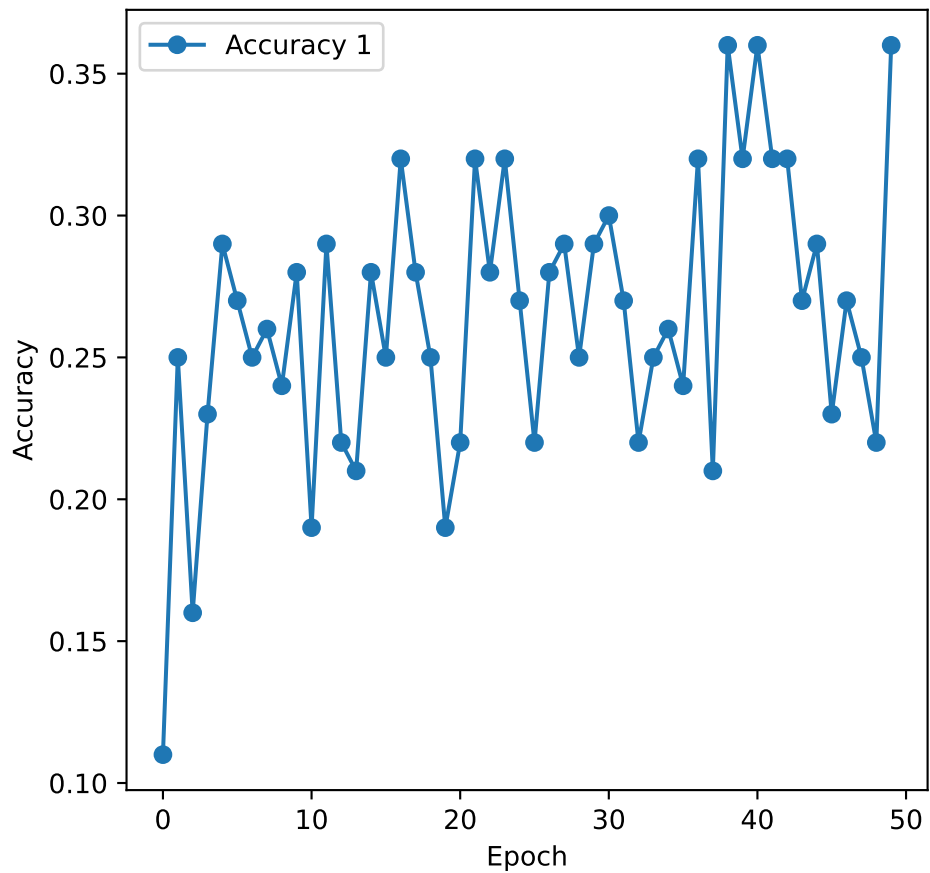

f2

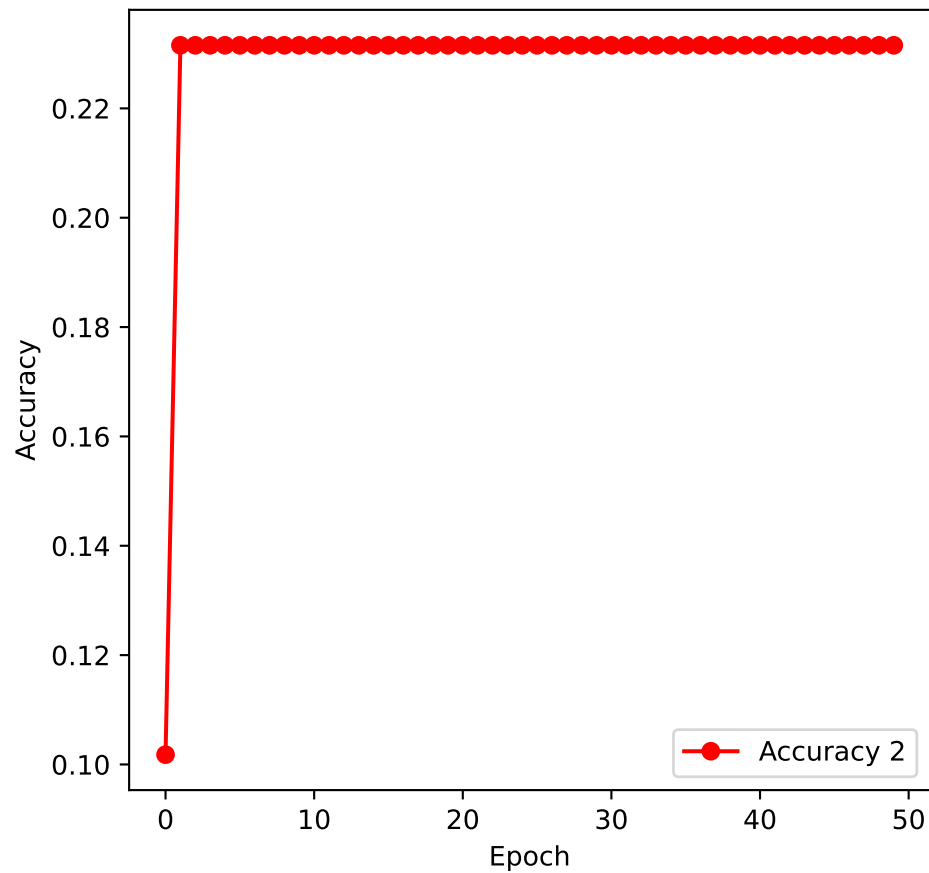

Supplement: supplementary_material [file llm_2s_exp0.002_acc.pdf › home/joseph/flo/EE_synthetic/figures/llm_2s_exp0.002_acc.pdf]

surrogate loss

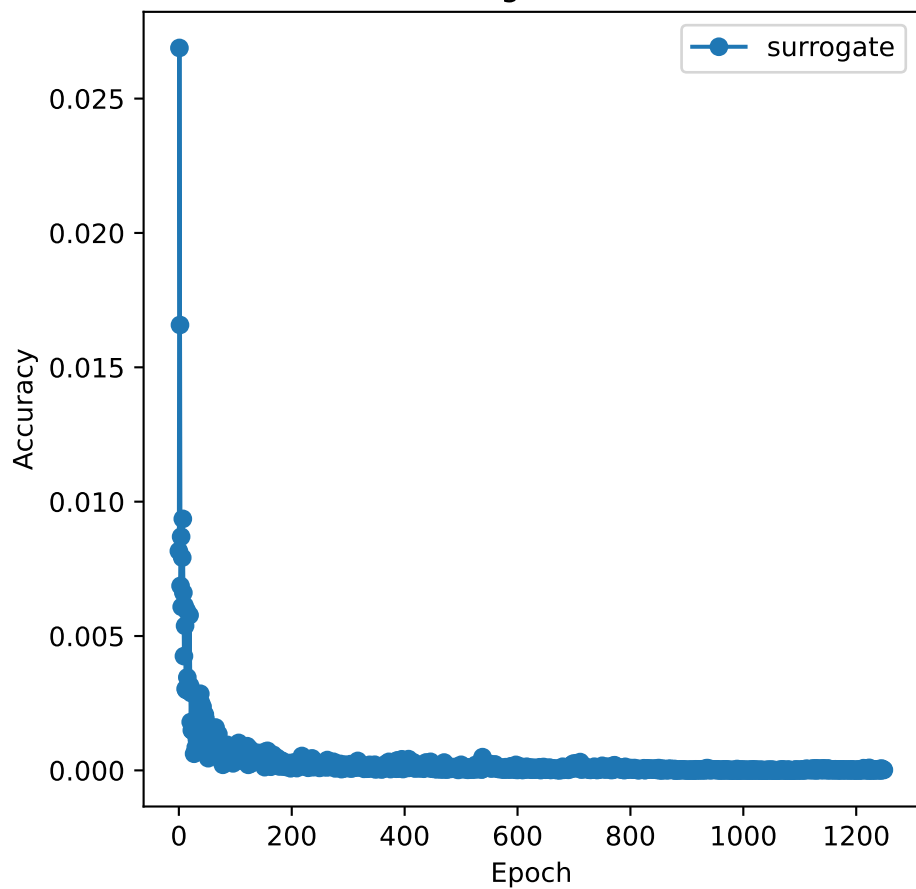

l01c on decision rule

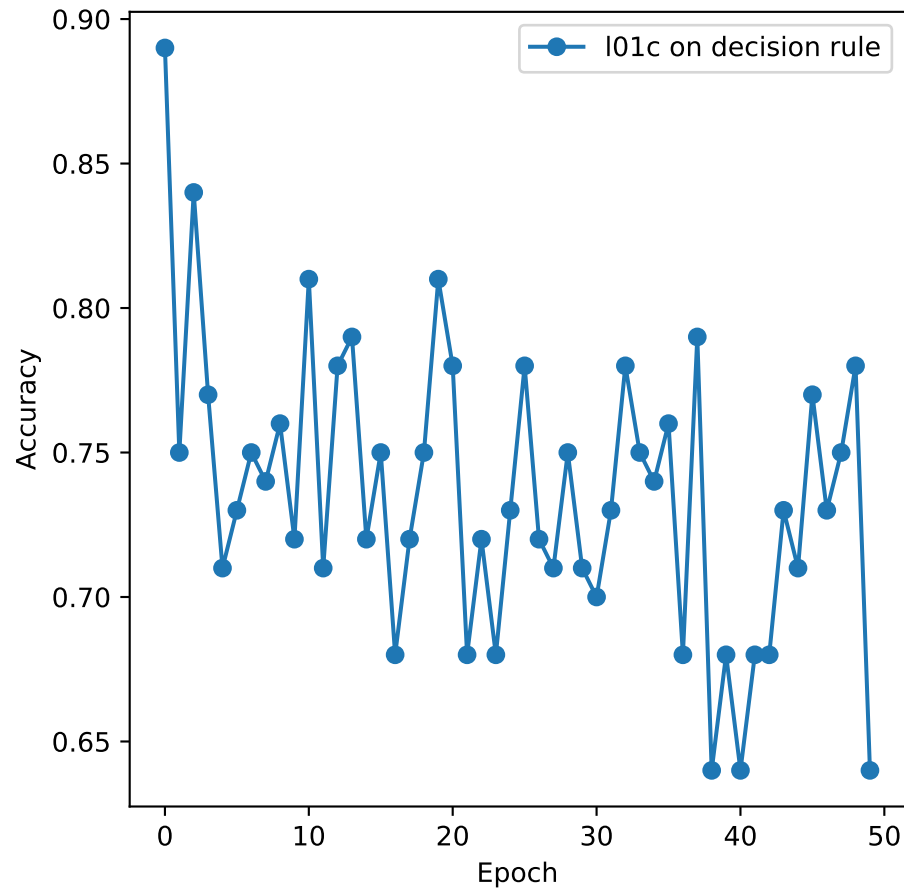

f1 loss

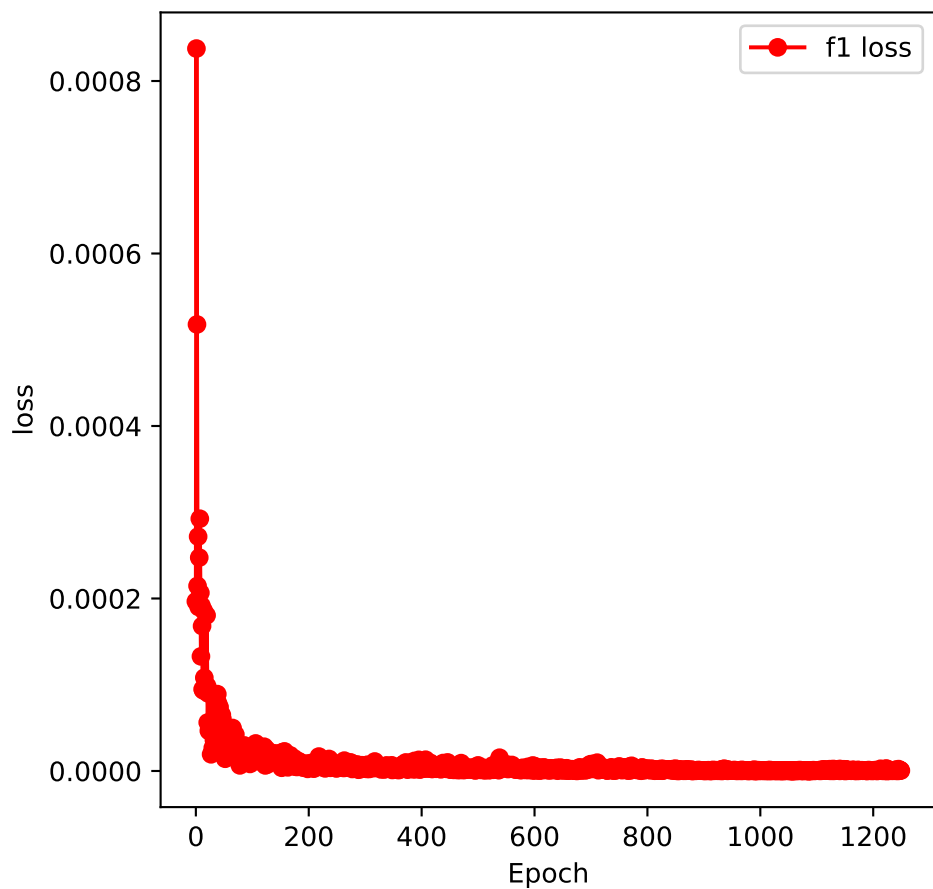

f2 loss

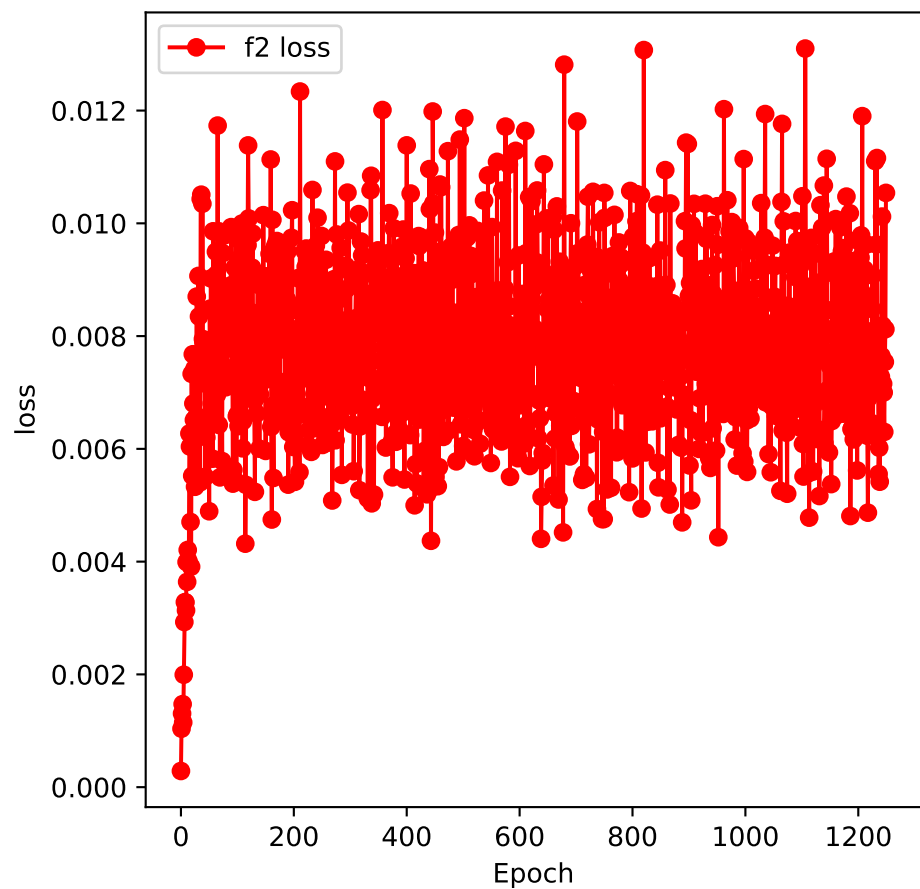

Supplement: supplementary_material [file llm_2s_exp0.002_losses.pdf › home/joseph/flo/EE_synthetic/figures/llm_2s_exp0.002_losses.pdf]

f1

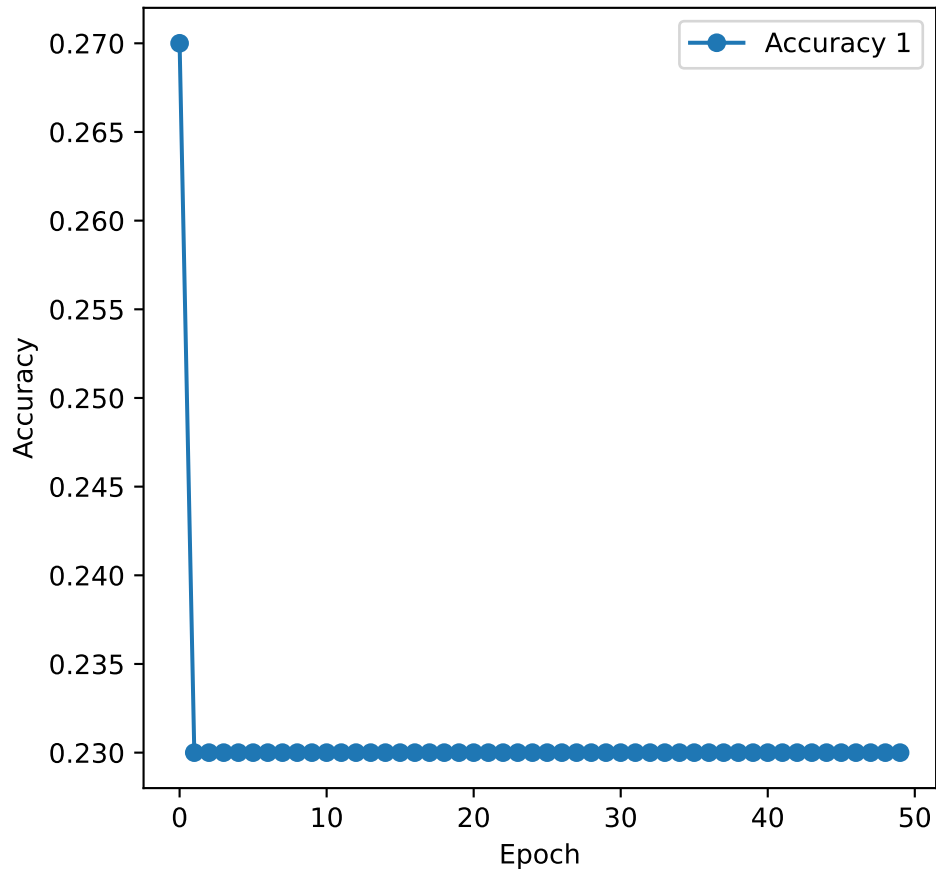

f2

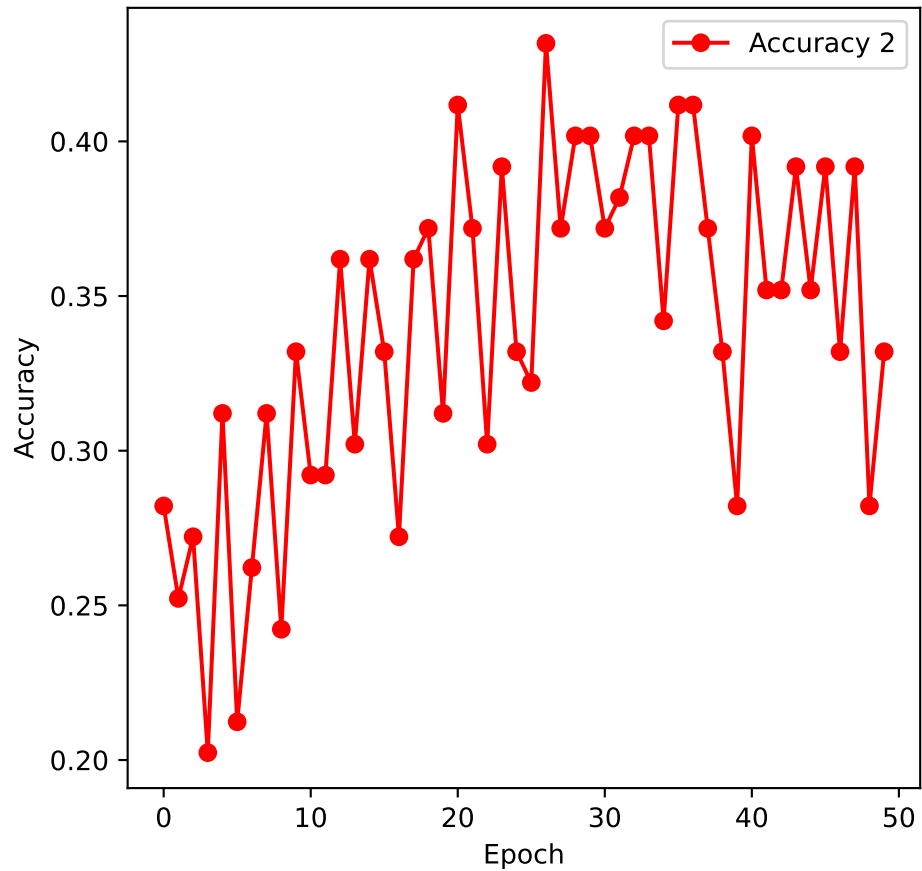

Supplement: supplementary_material [file llm_2s_exp0.003_acc.pdf › home/joseph/flo/EE_synthetic/figures/llm_2s_exp0.003_acc.pdf]

surrogate loss

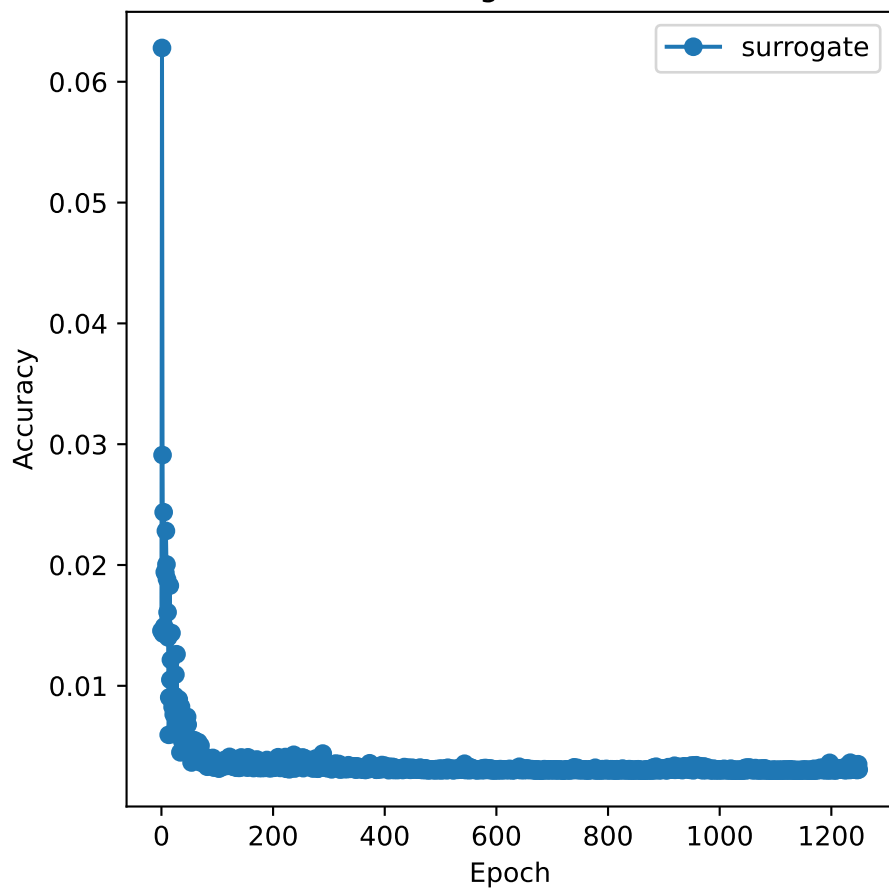

l01c on decision rule

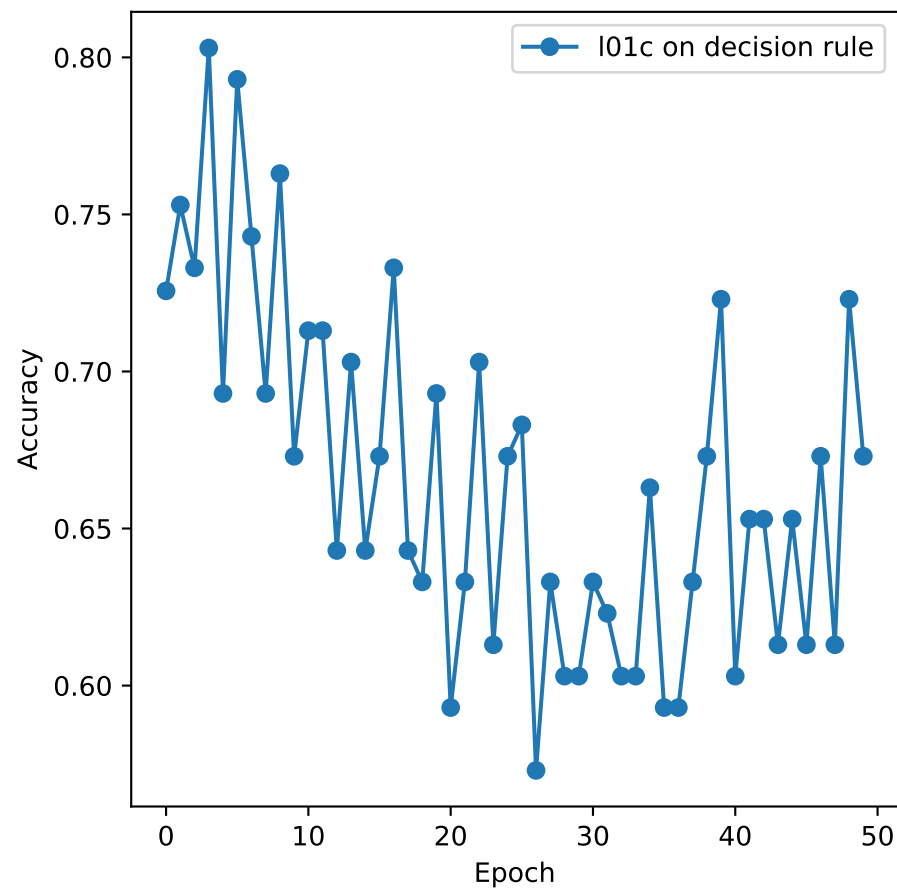

f1 loss

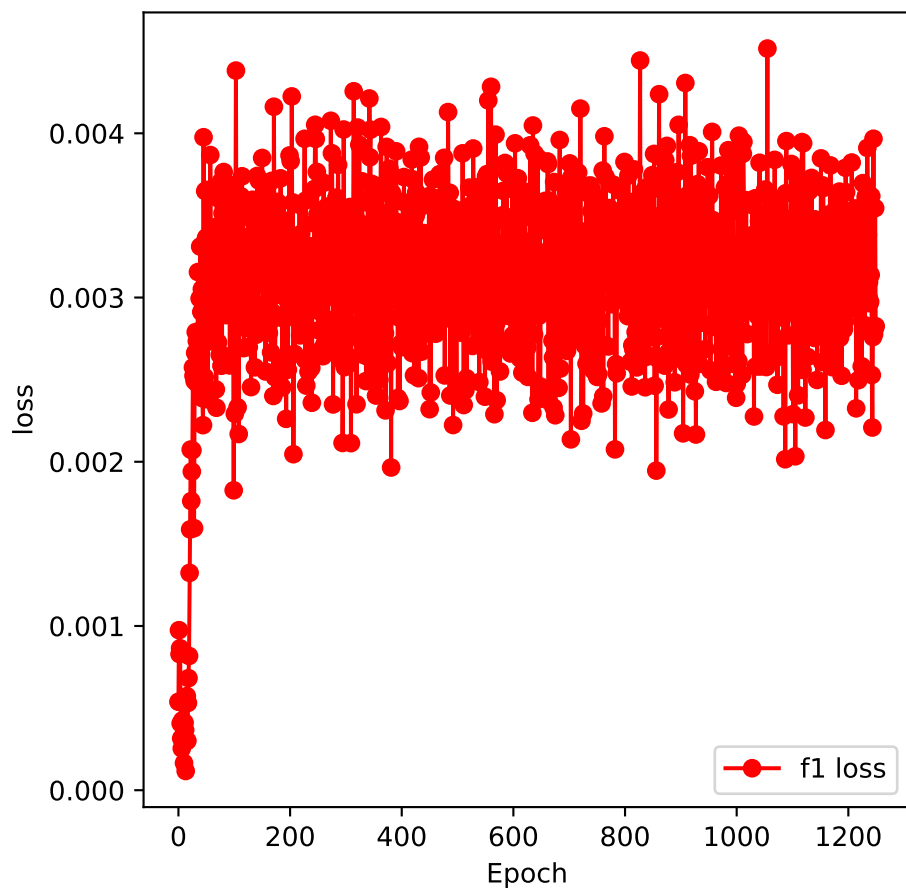

f2 loss

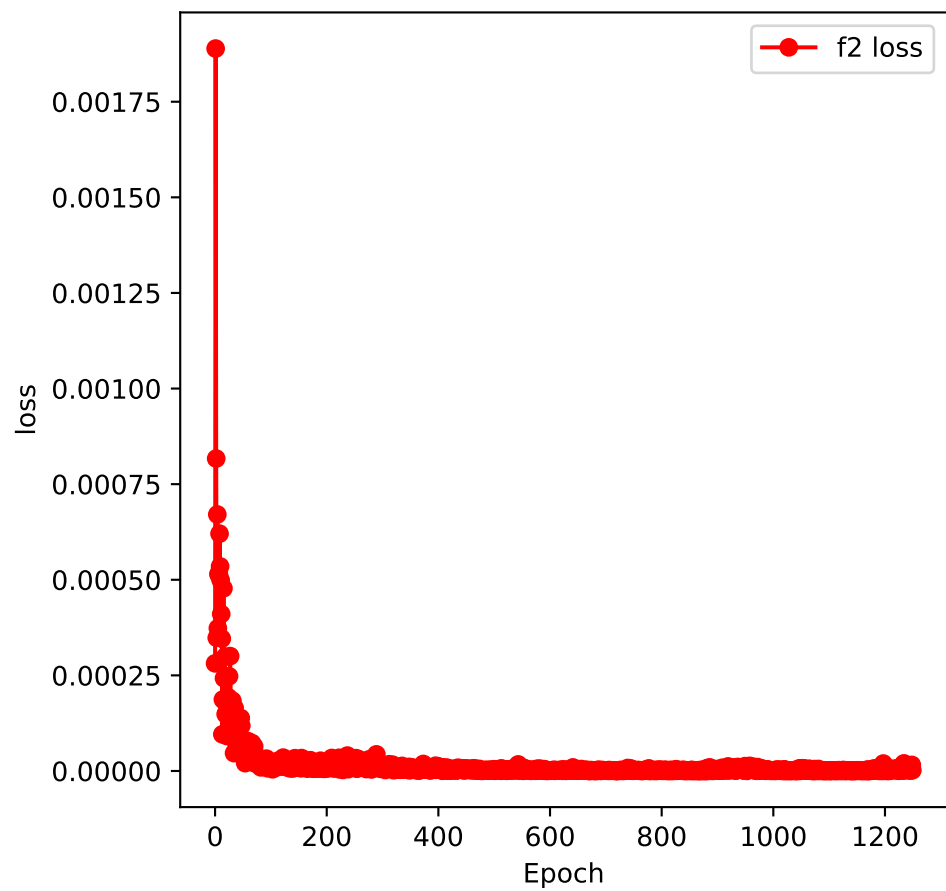

Supplement: supplementary_material [file llm_2s_exp0.003_losses.pdf › home/joseph/flo/EE_synthetic/figures/llm_2s_exp0.003_losses.pdf]

f1

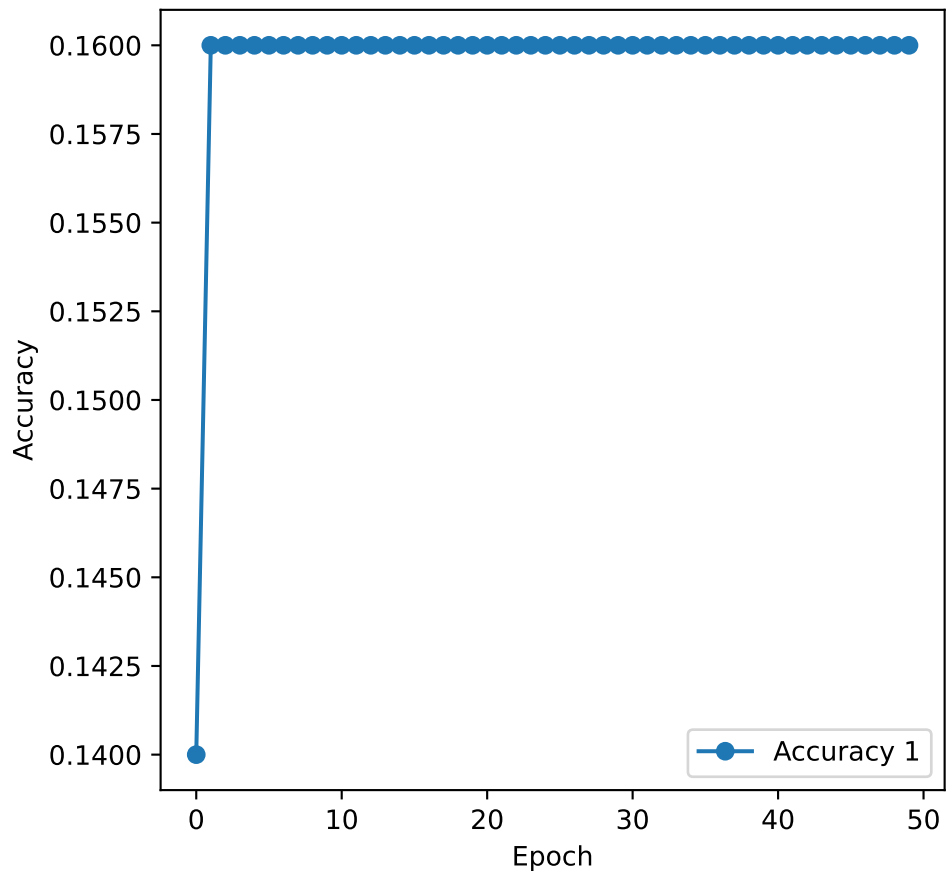

f2

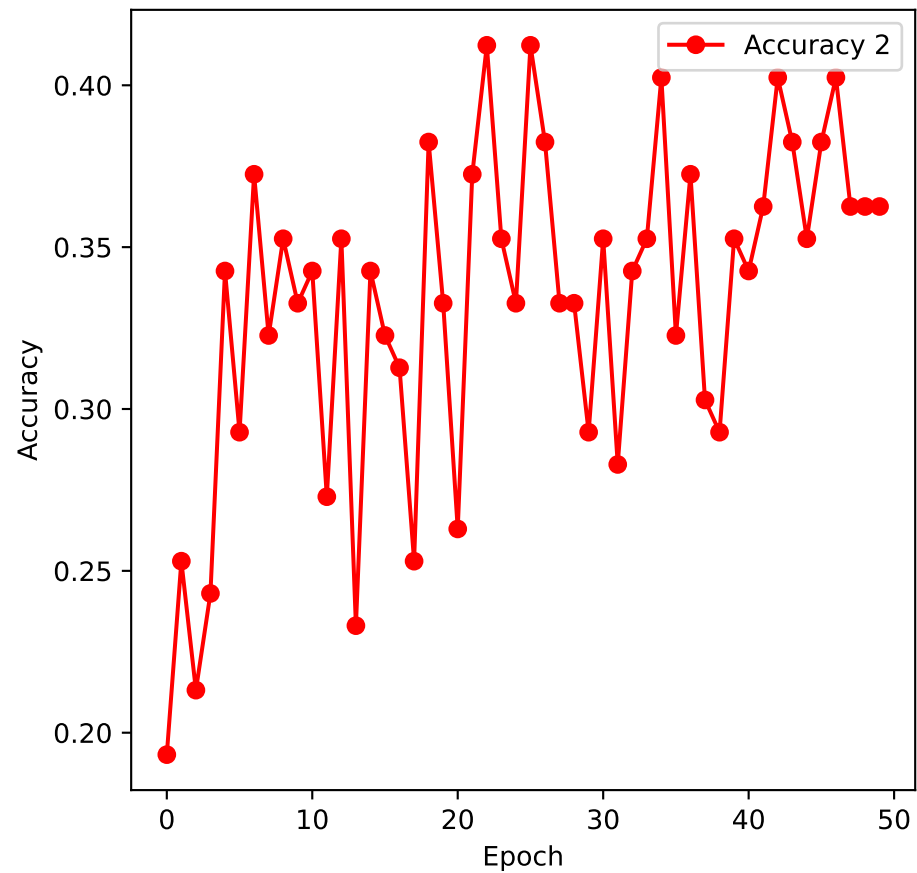

Supplement: supplementary_material [file llm_2s_exp0.004_acc.pdf › home/joseph/flo/EE_synthetic/figures/llm_2s_exp0.004_acc.pdf]

surrogate loss

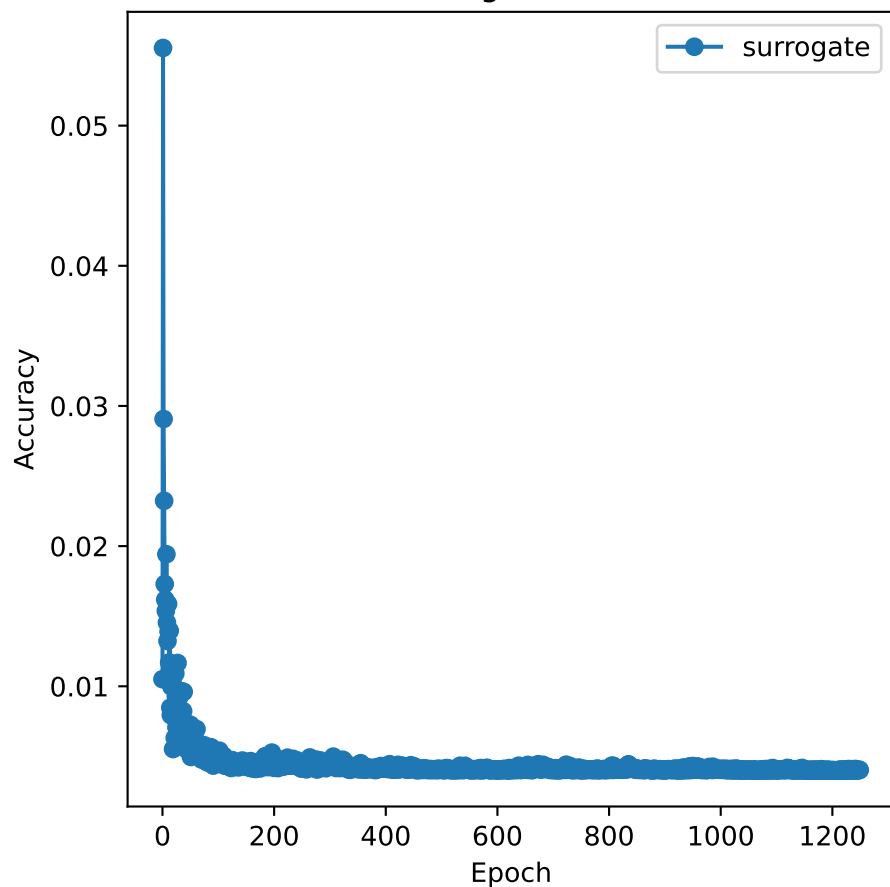

l01c on decision rule

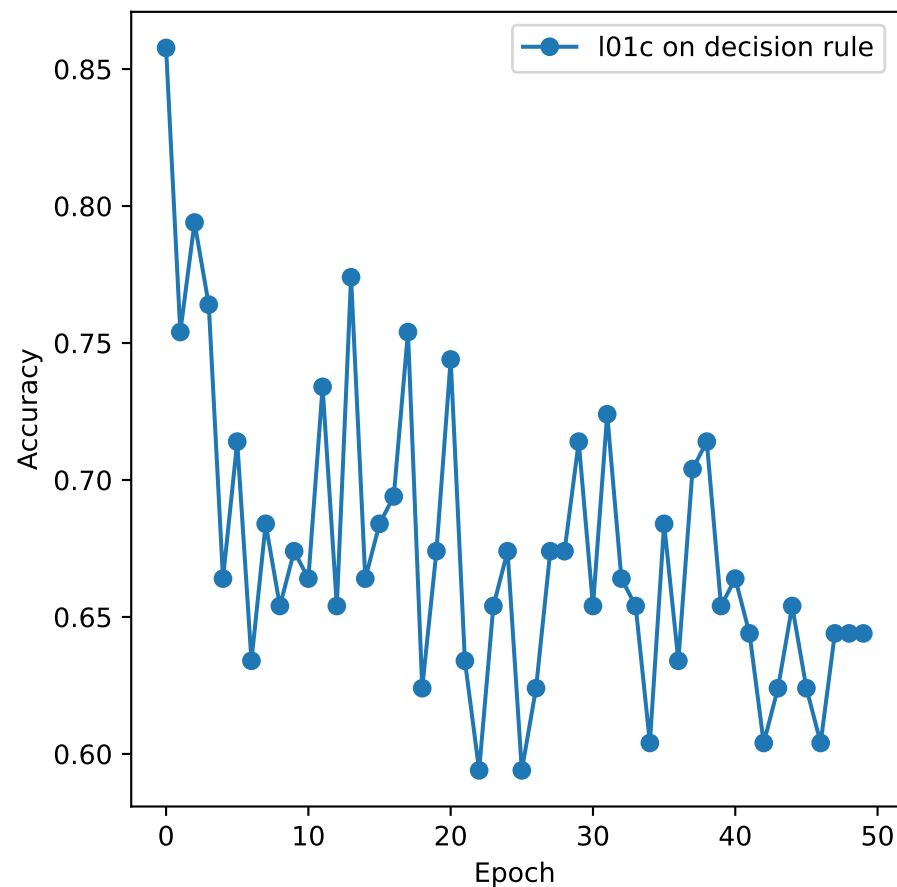

f1 loss

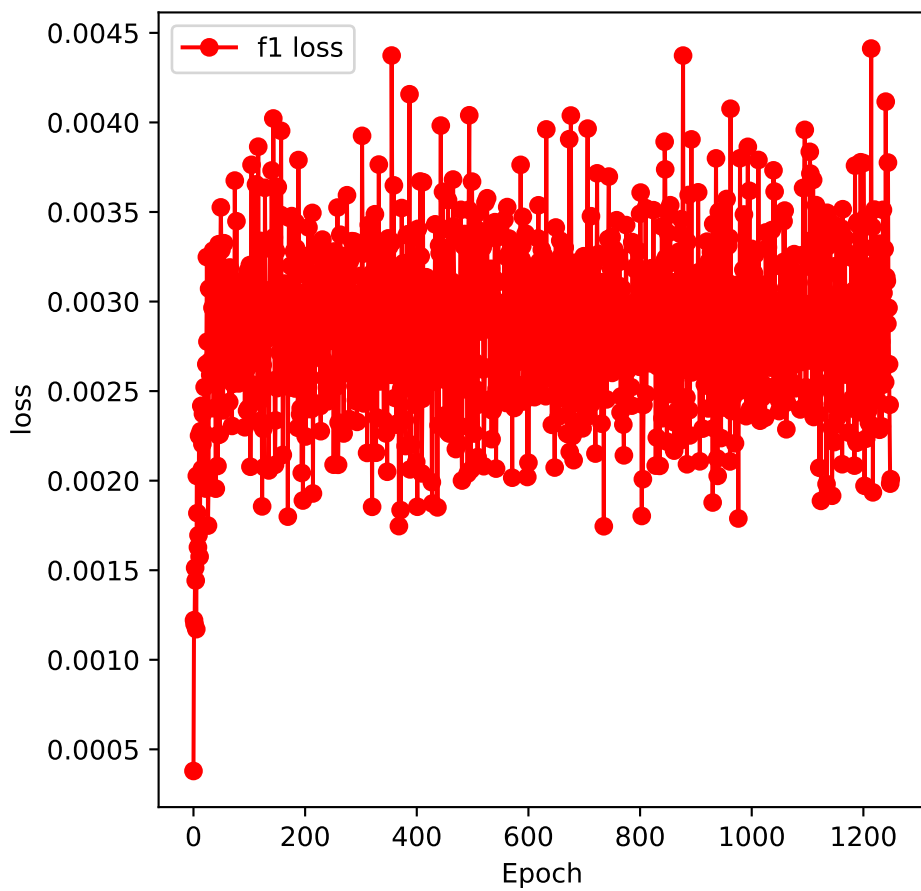

f2 loss

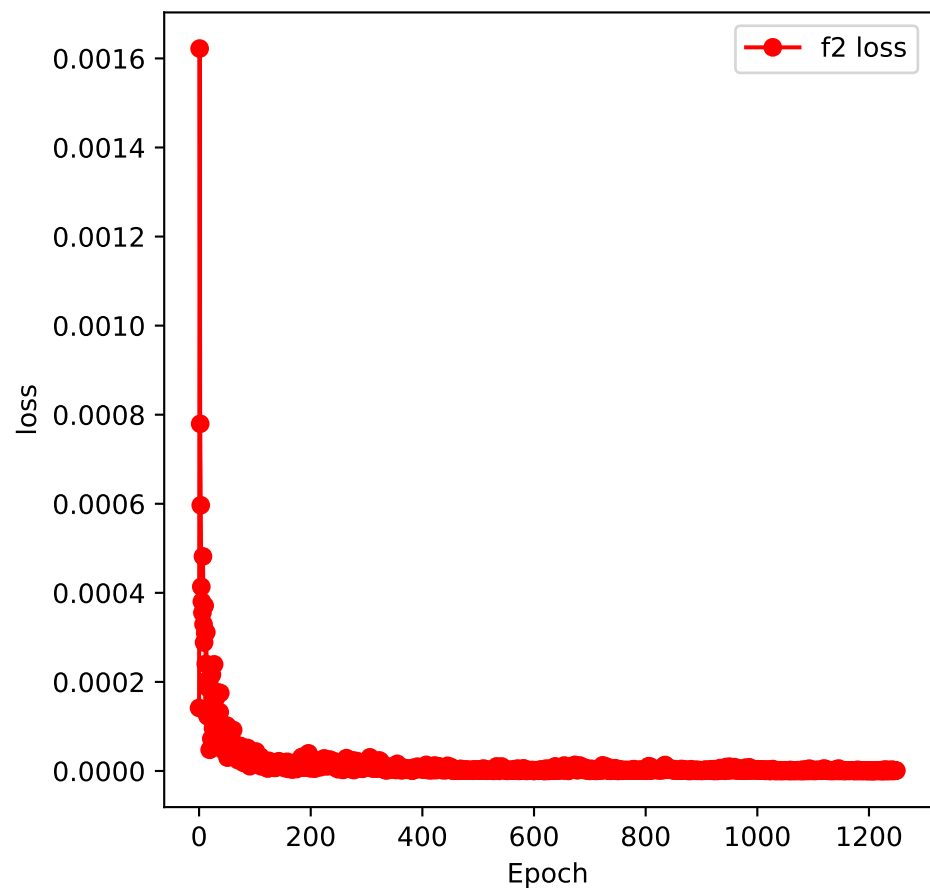

Supplement: supplementary_material [file llm_2s_exp0.004_losses.pdf › home/joseph/flo/EE_synthetic/figures/llm_2s_exp0.004_losses.pdf]

f1

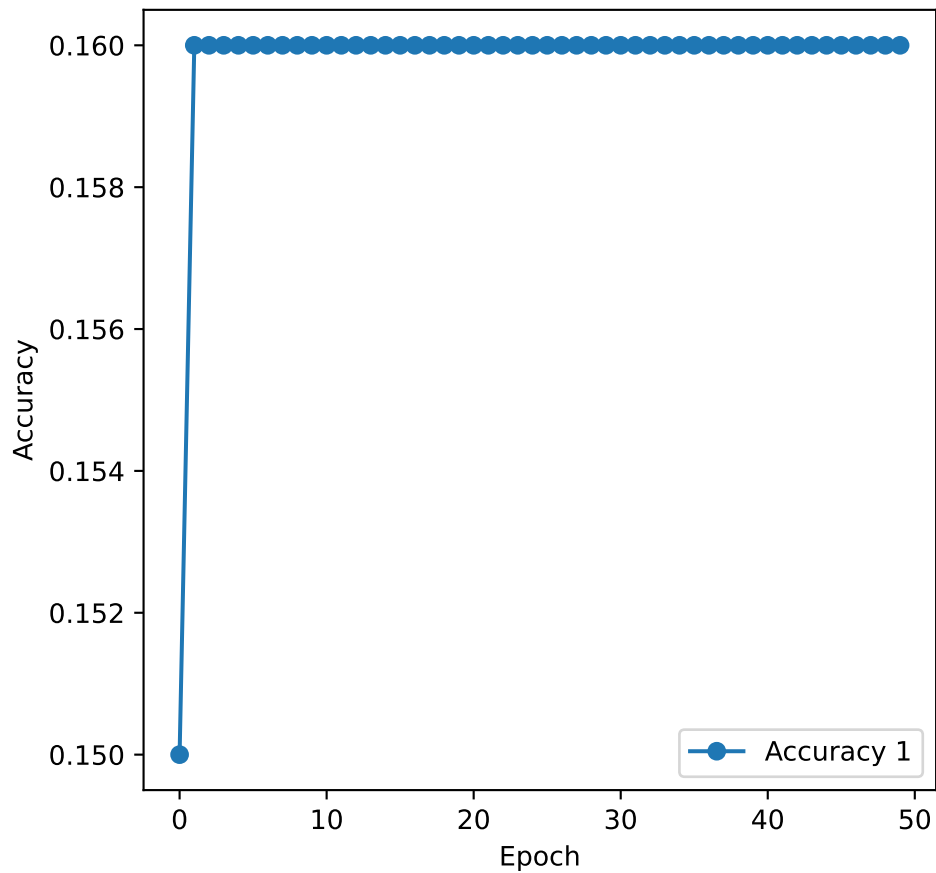

f2

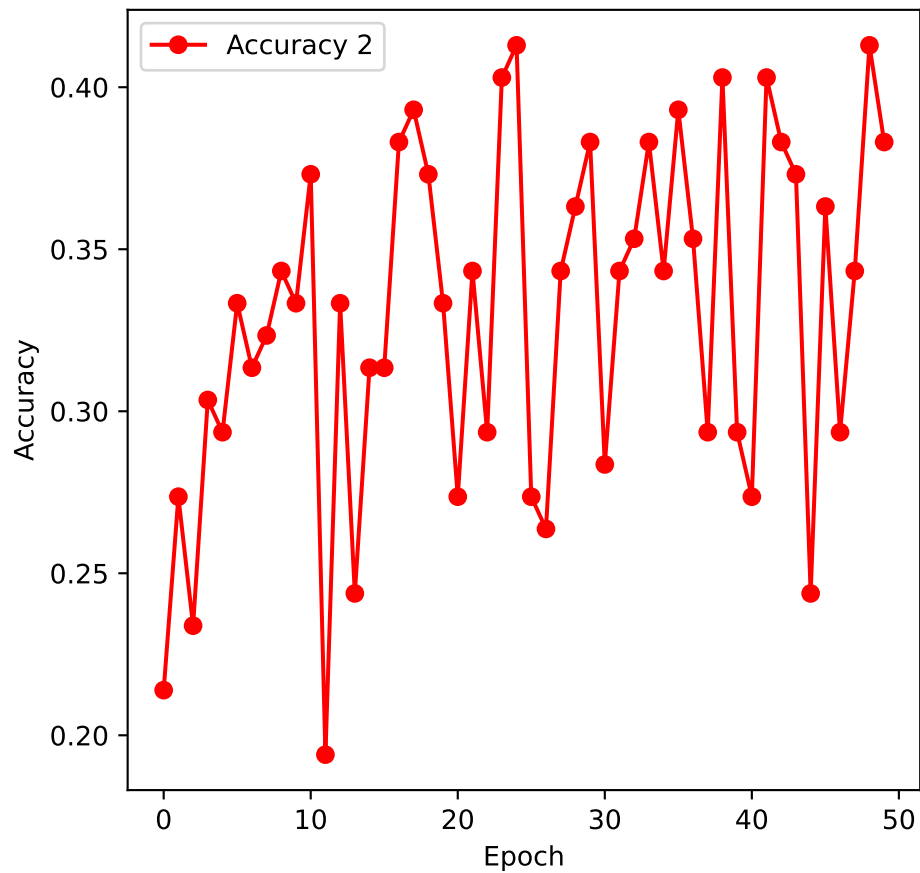

Supplement: supplementary_material [file llm_2s_exp0.005_acc.pdf › home/joseph/flo/EE_synthetic/figures/llm_2s_exp0.005_acc.pdf]

surrogate loss

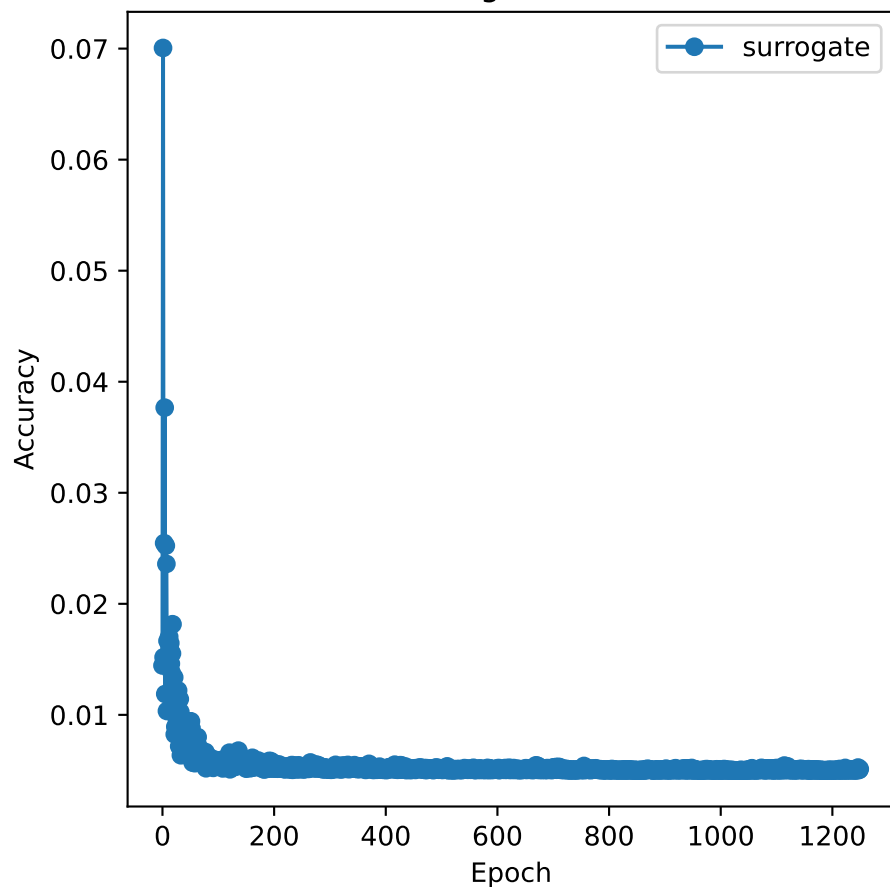

l01c on decision rule

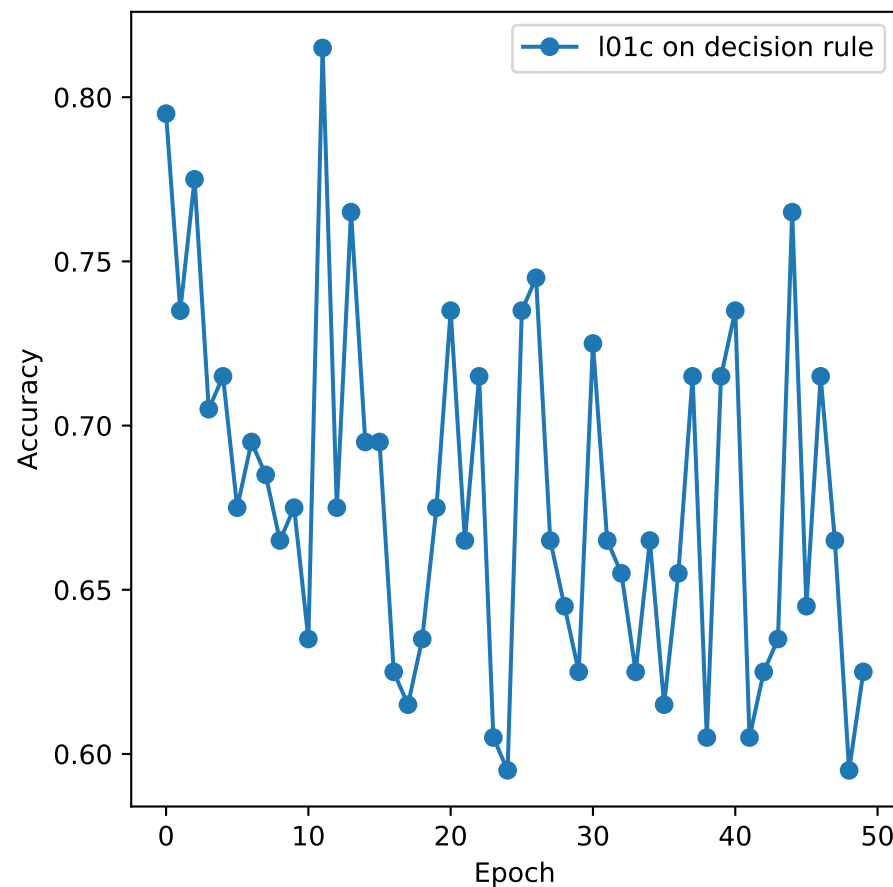

f1 loss

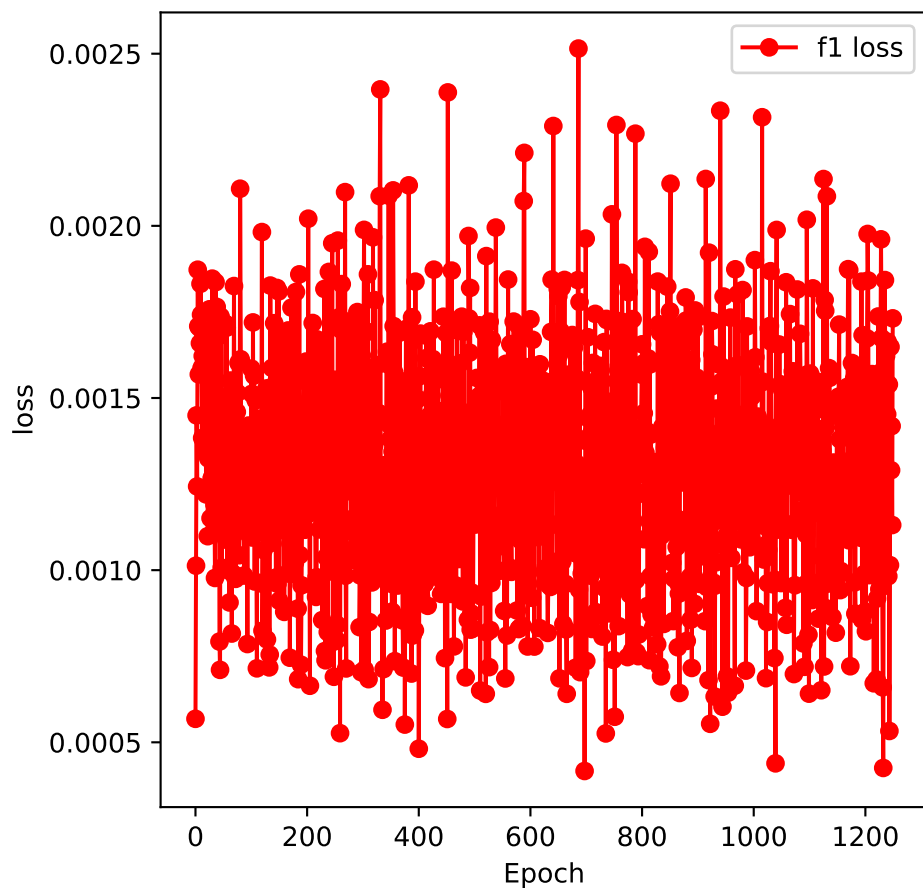

f2 loss

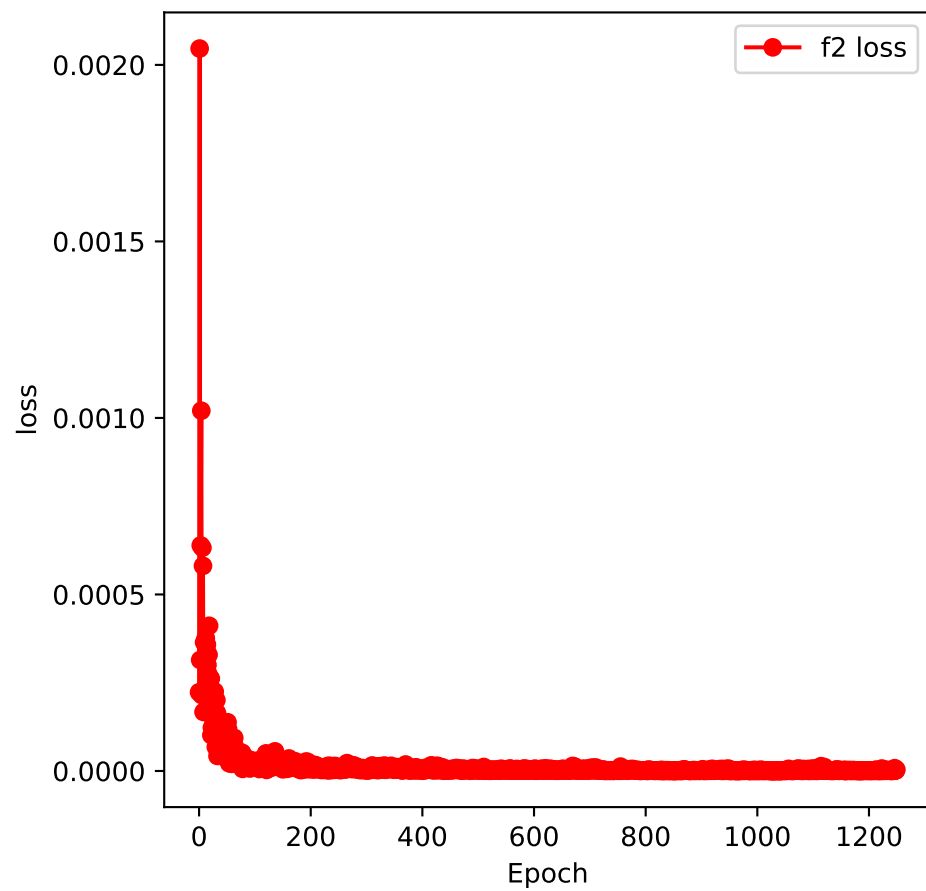

Supplement: supplementary_material [file llm_2s_exp0.005_losses.pdf › home/joseph/flo/EE_synthetic/figures/llm_2s_exp0.005_losses.pdf]

f1

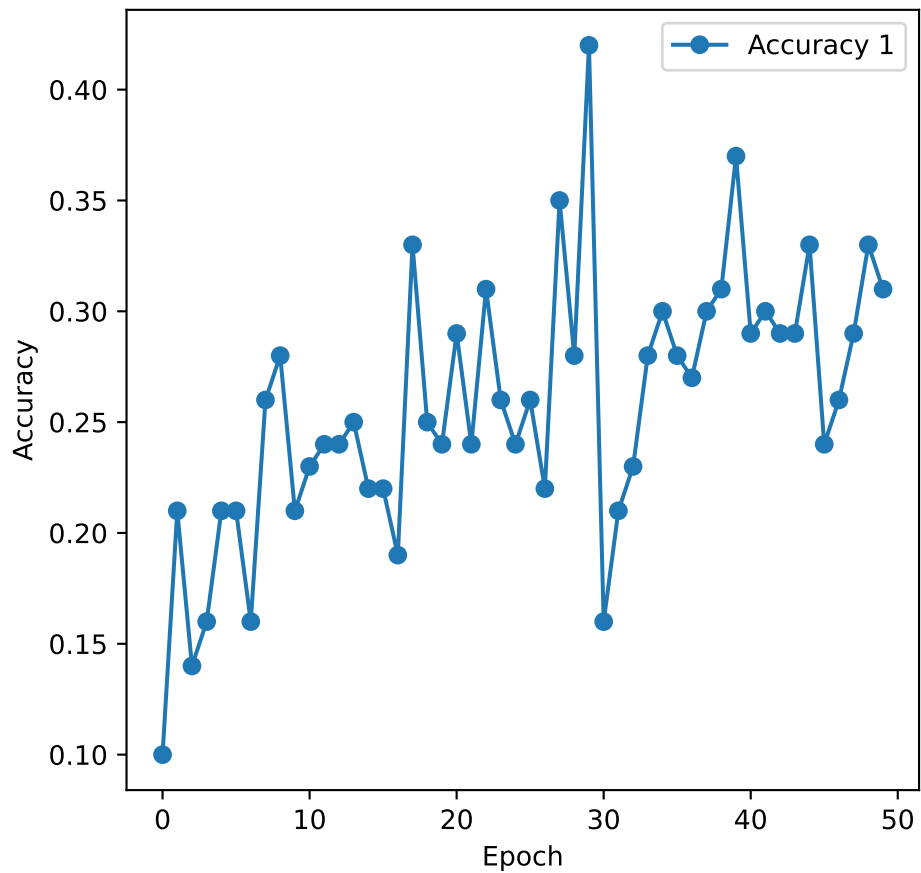

f2

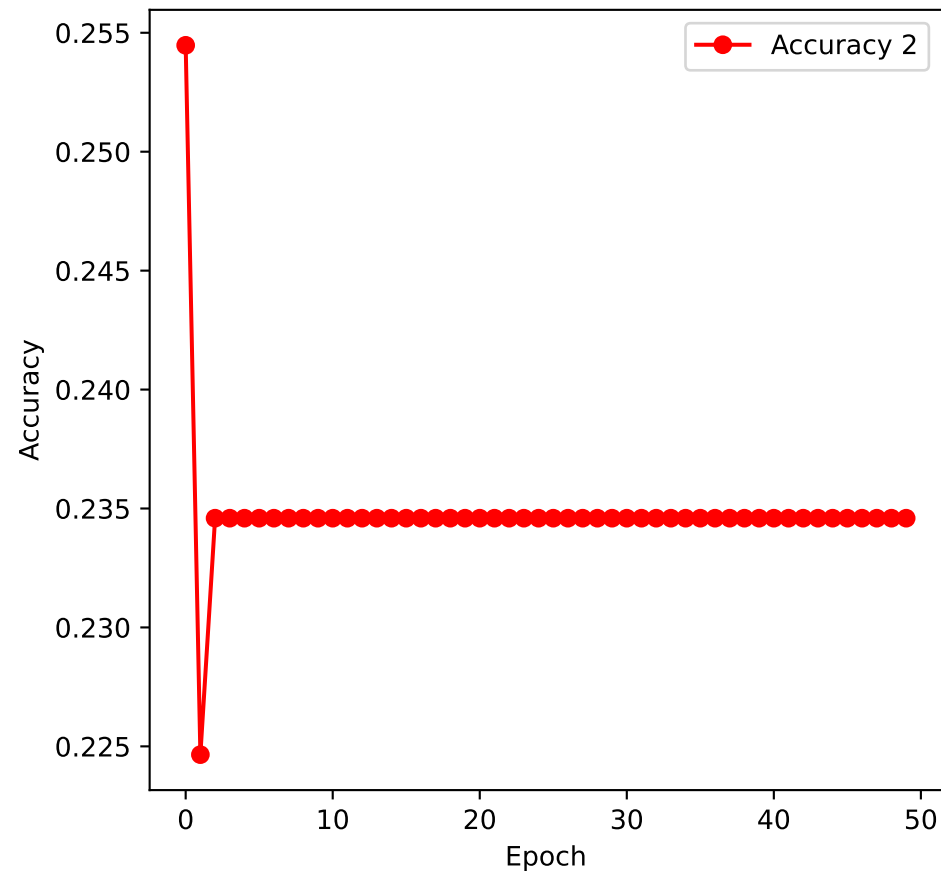

Supplement: supplementary_material [file llm_2s_exp0.006_acc.pdf › home/joseph/flo/EE_synthetic/figures/llm_2s_exp0.006_acc.pdf]

surrogate loss

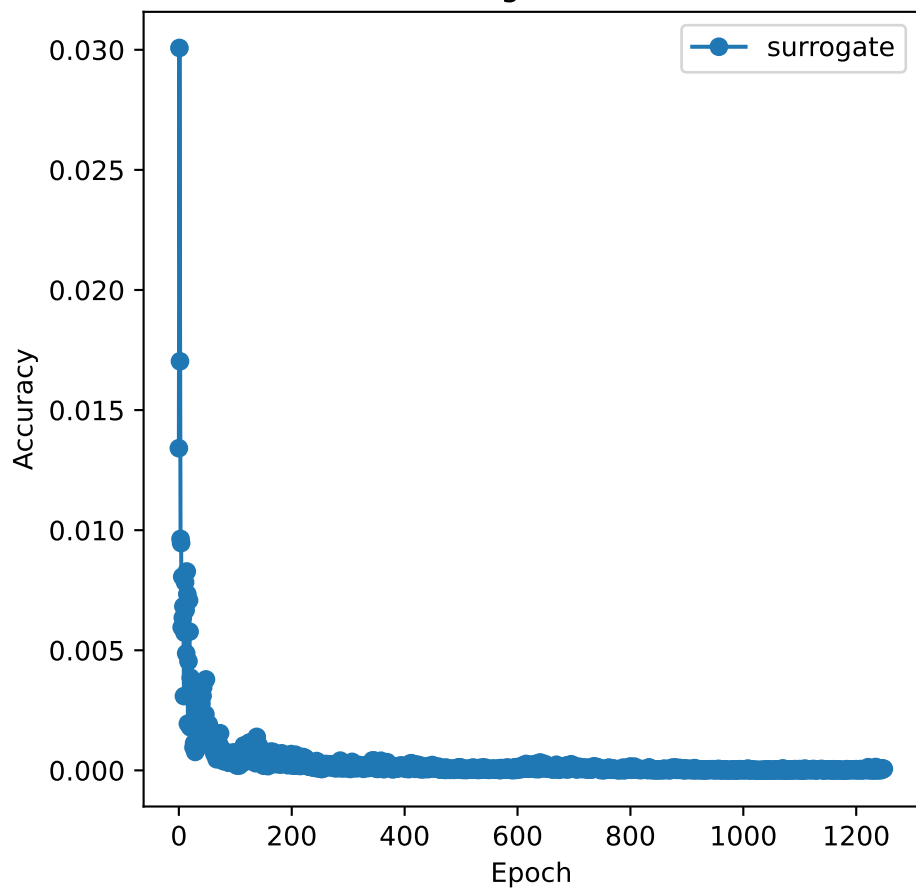

l01c on decision rule

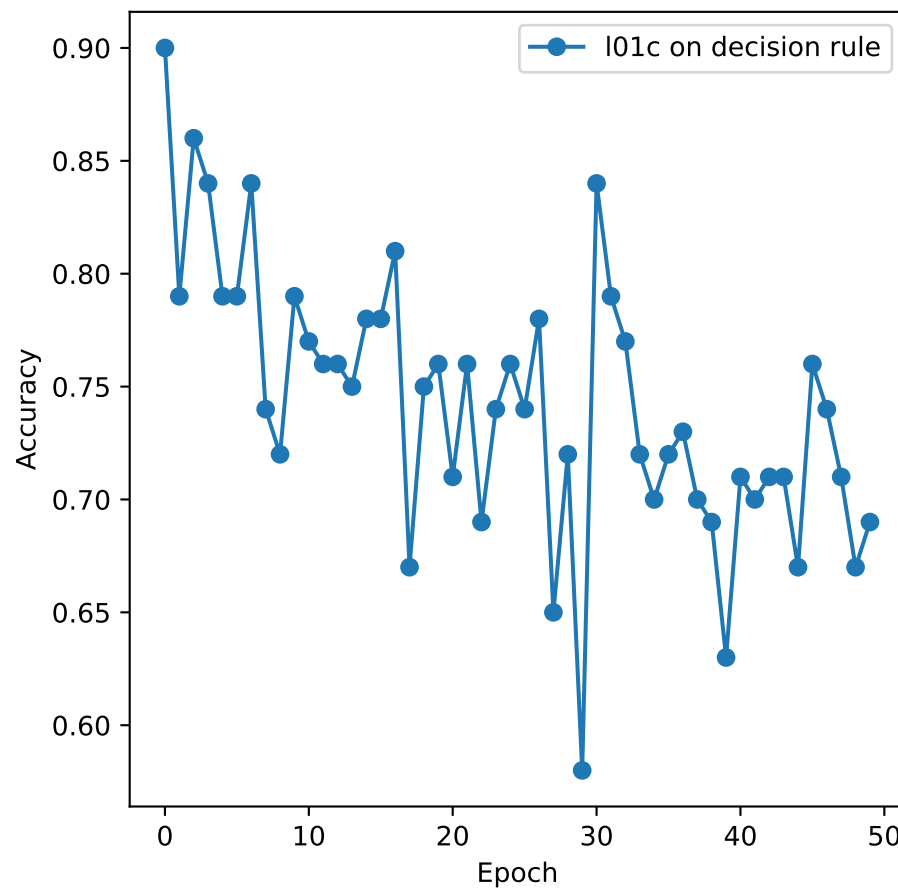

f1 loss

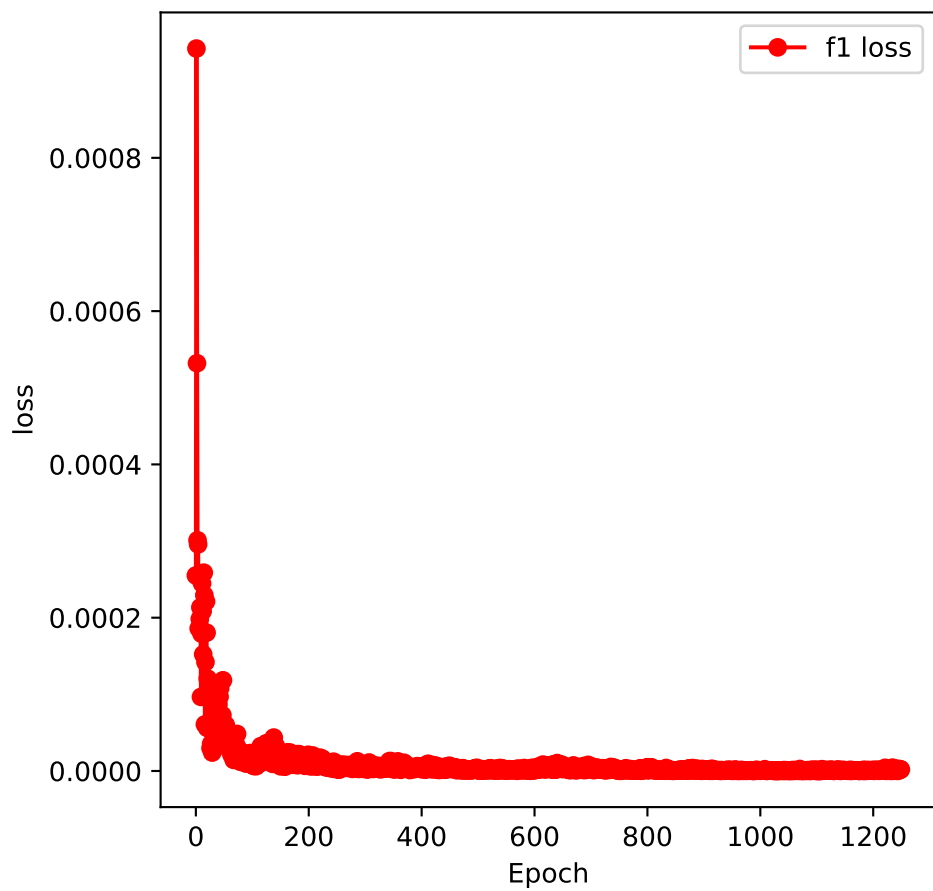

f2 loss

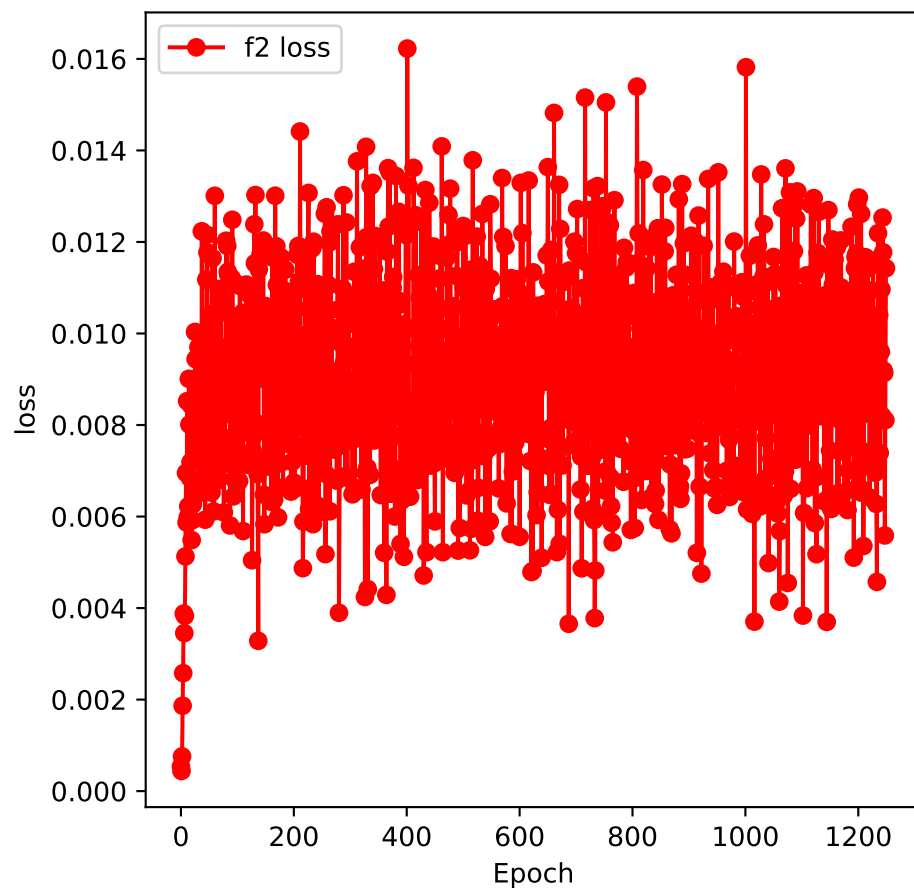

Supplement: supplementary_material [file llm_2s_exp0.006_losses.pdf › home/joseph/flo/EE_synthetic/figures/llm_2s_exp0.006_losses.pdf]

f1

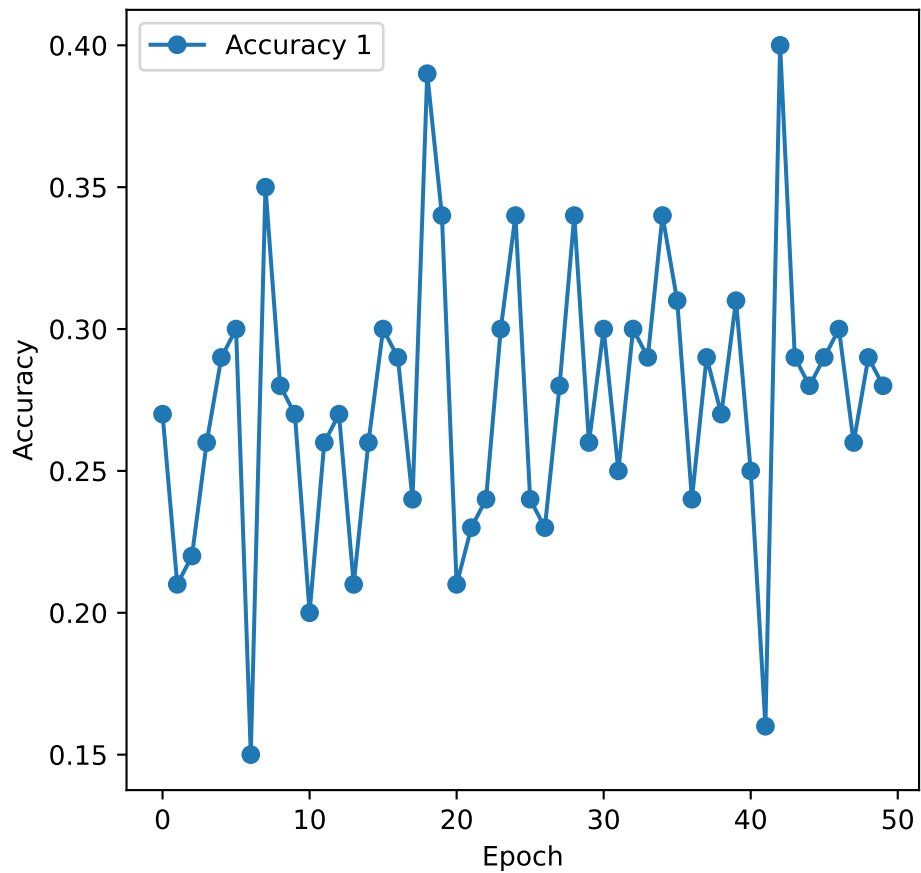

f2

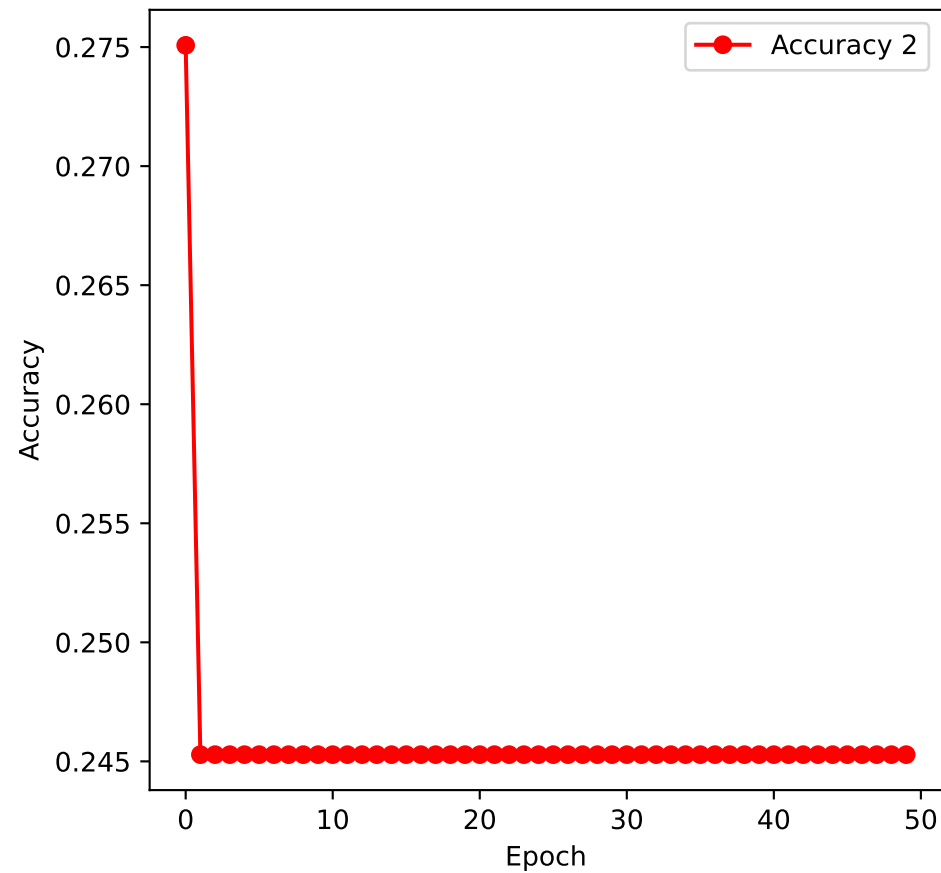

Supplement: supplementary_material [file llm_2s_exp0.007_acc.pdf › home/joseph/flo/EE_synthetic/figures/llm_2s_exp0.007_acc.pdf]

surrogate loss

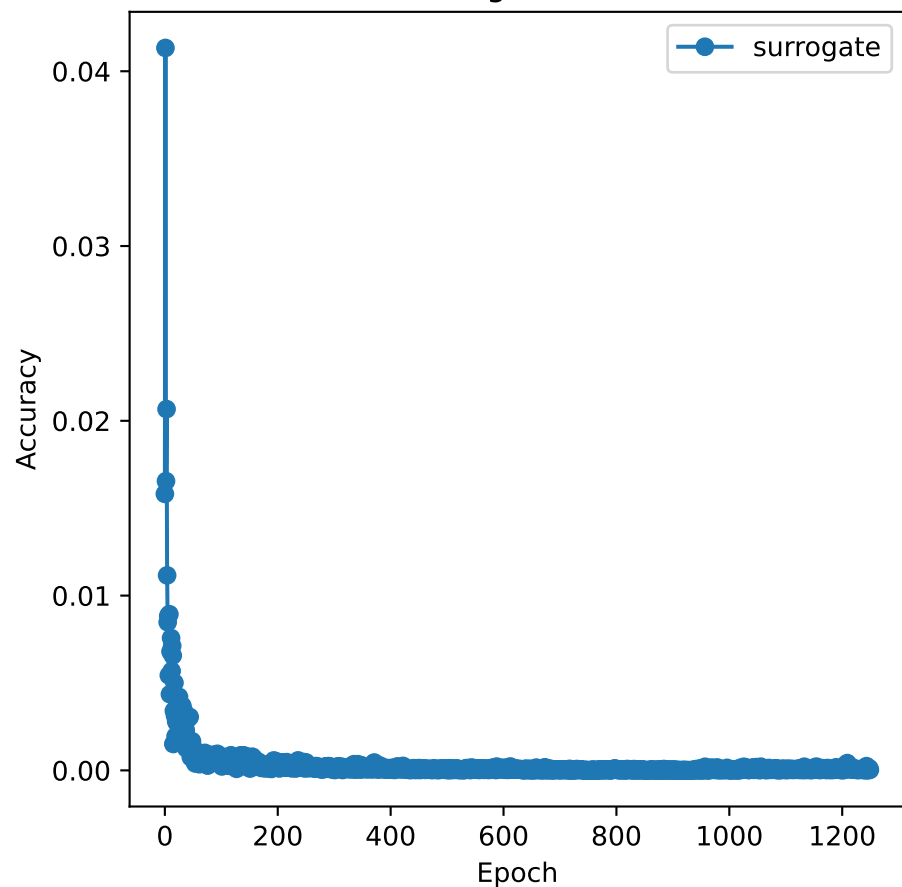

l01c on decision rule

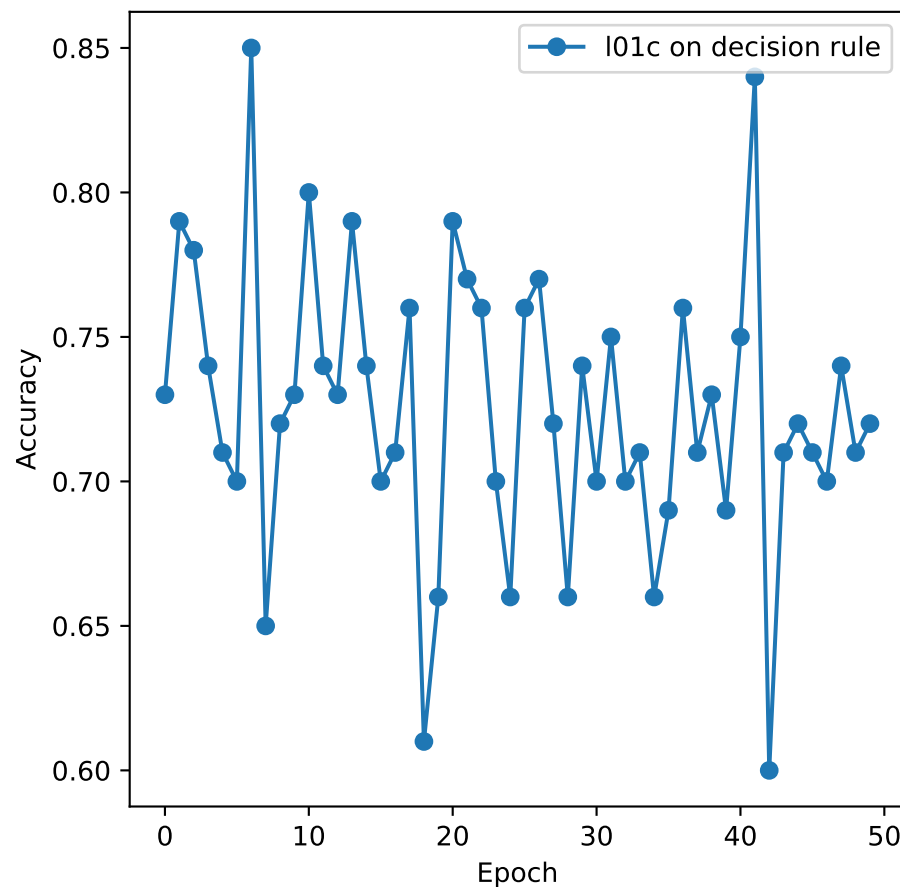

f1 loss

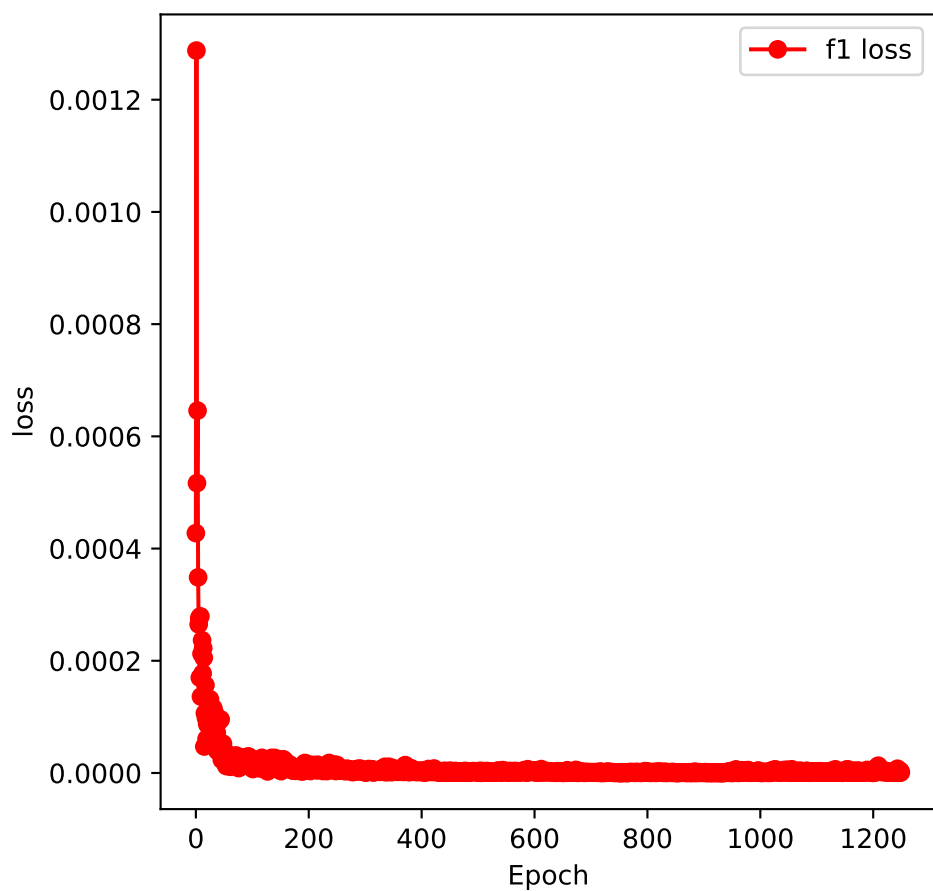

f2 loss

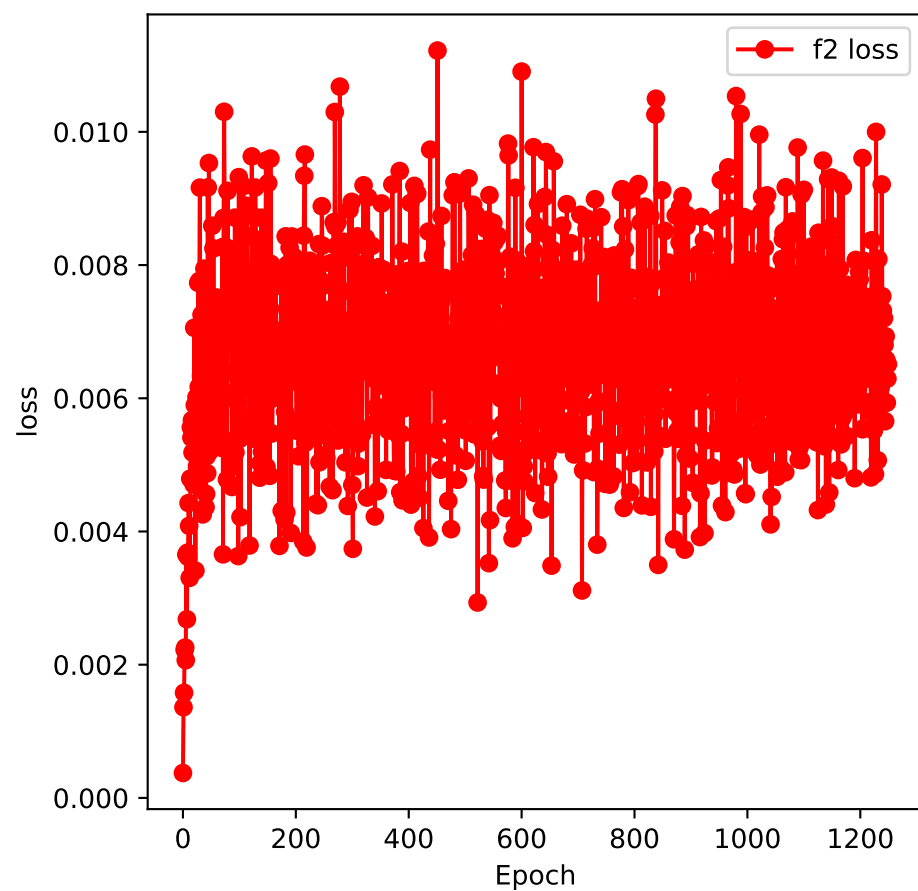

Supplement: supplementary_material [file llm_2s_exp0.007_losses.pdf › home/joseph/flo/EE_synthetic/figures/llm_2s_exp0.007_losses.pdf]

f1

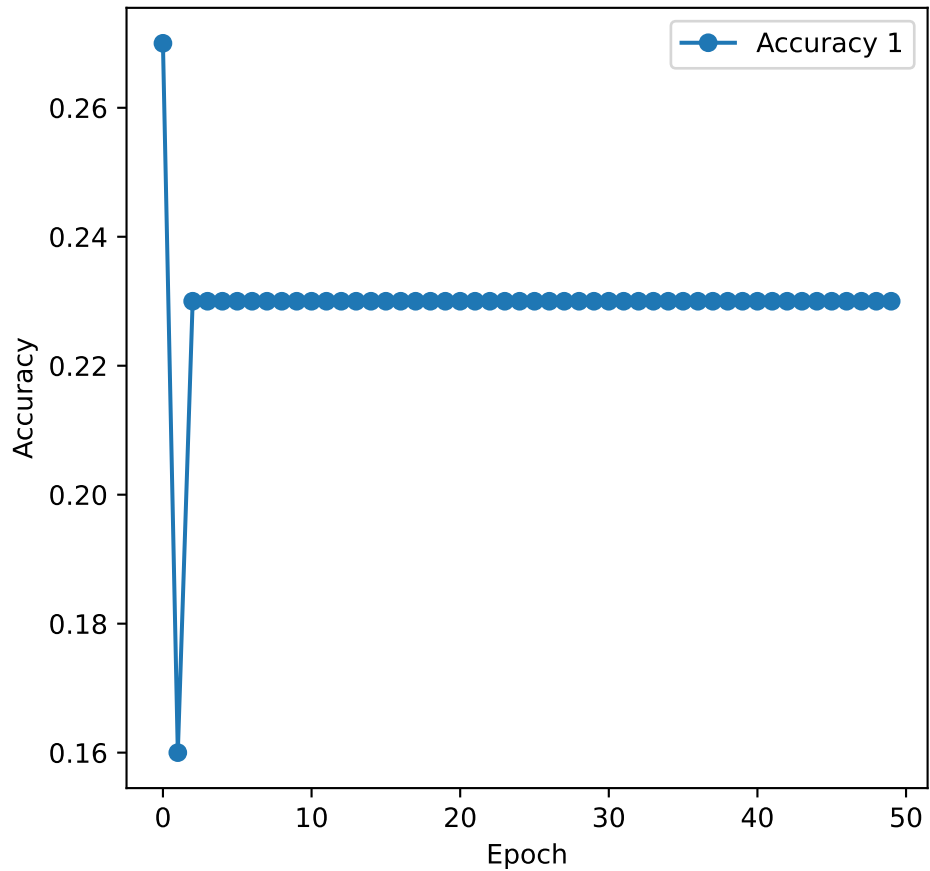

f2

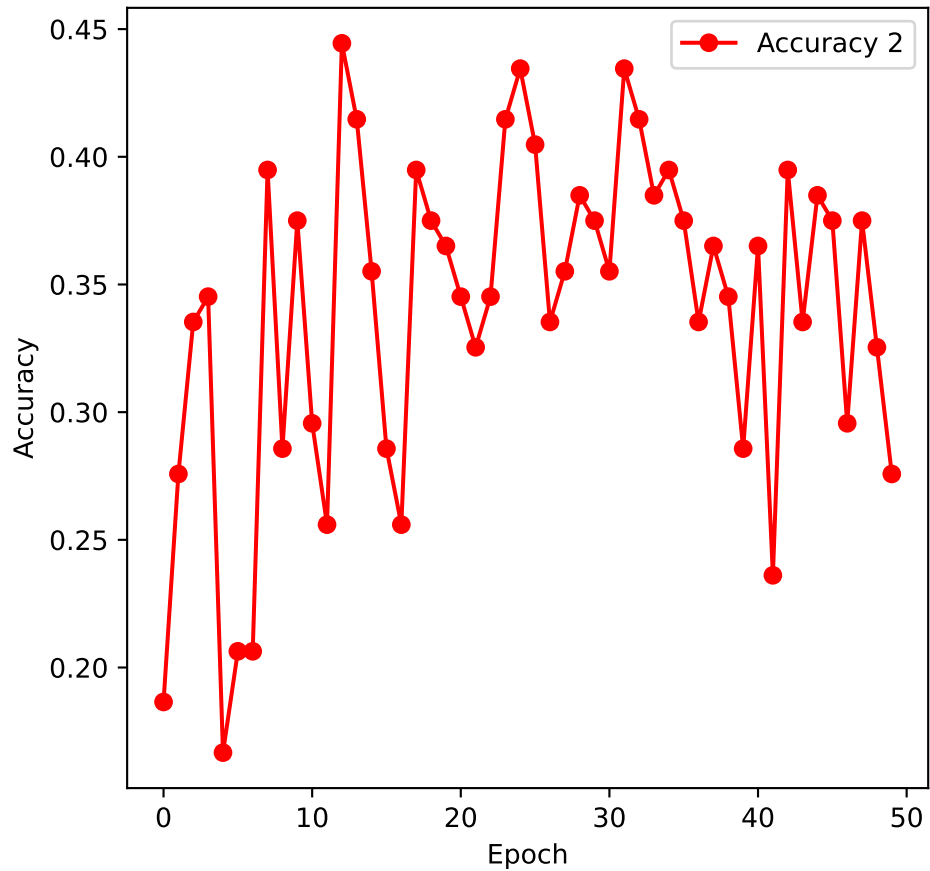

Supplement: supplementary_material [file llm_2s_exp0.008_acc.pdf › home/joseph/flo/EE_synthetic/figures/llm_2s_exp0.008_acc.pdf]

surrogate loss

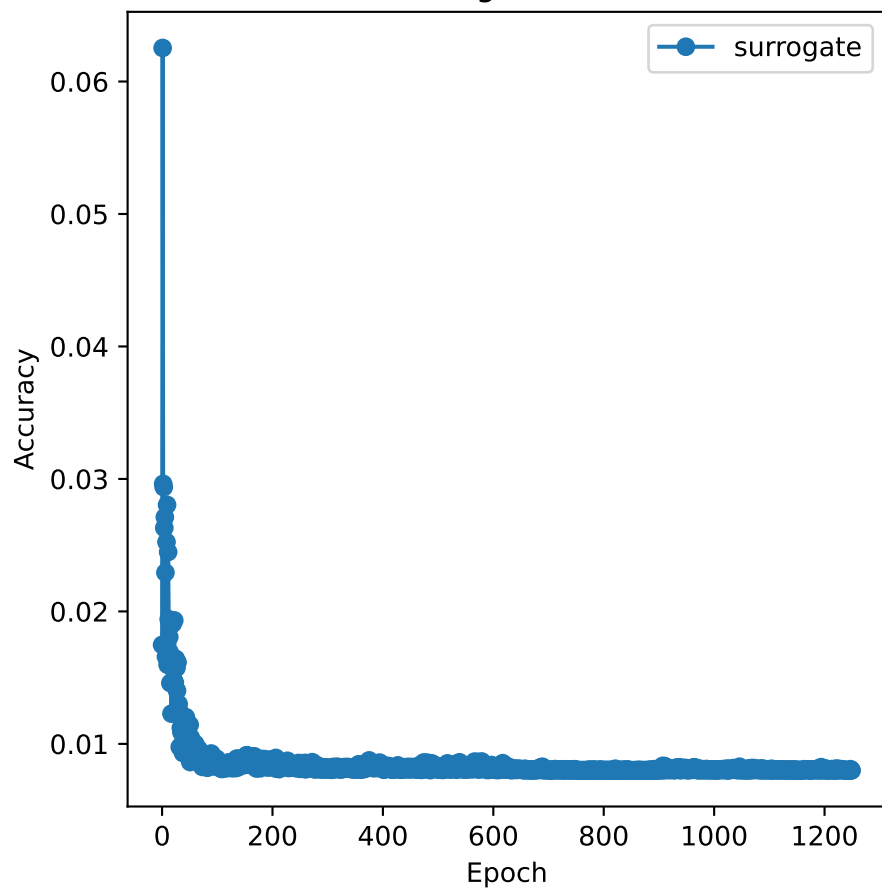

l01c on decision rule

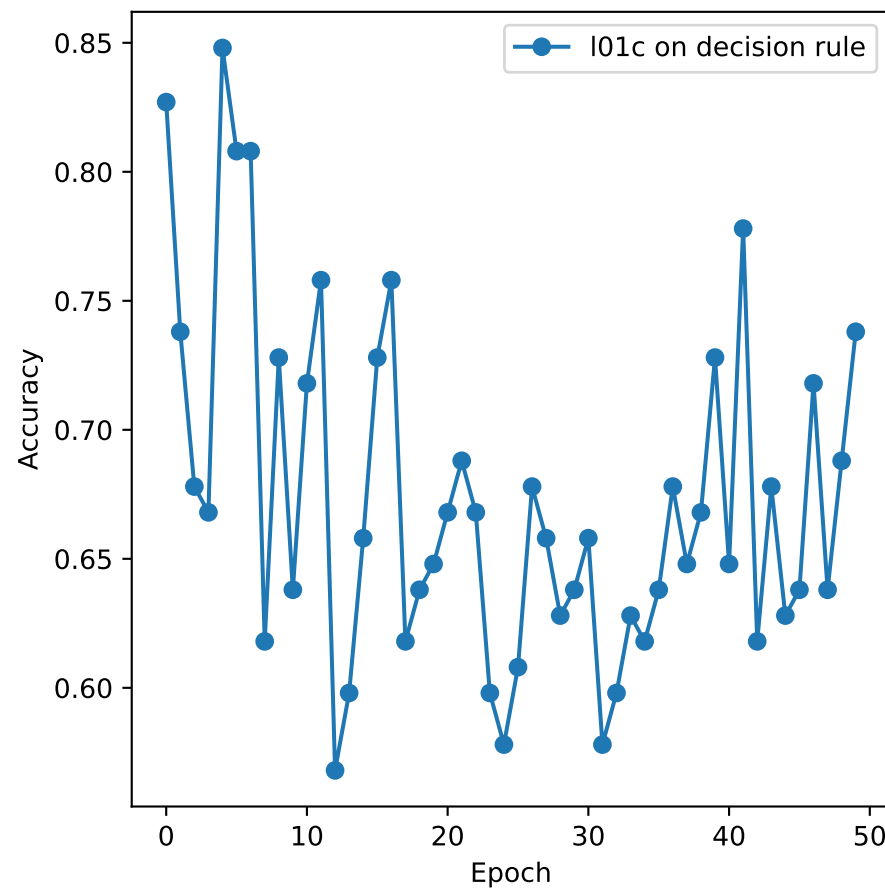

f1 loss

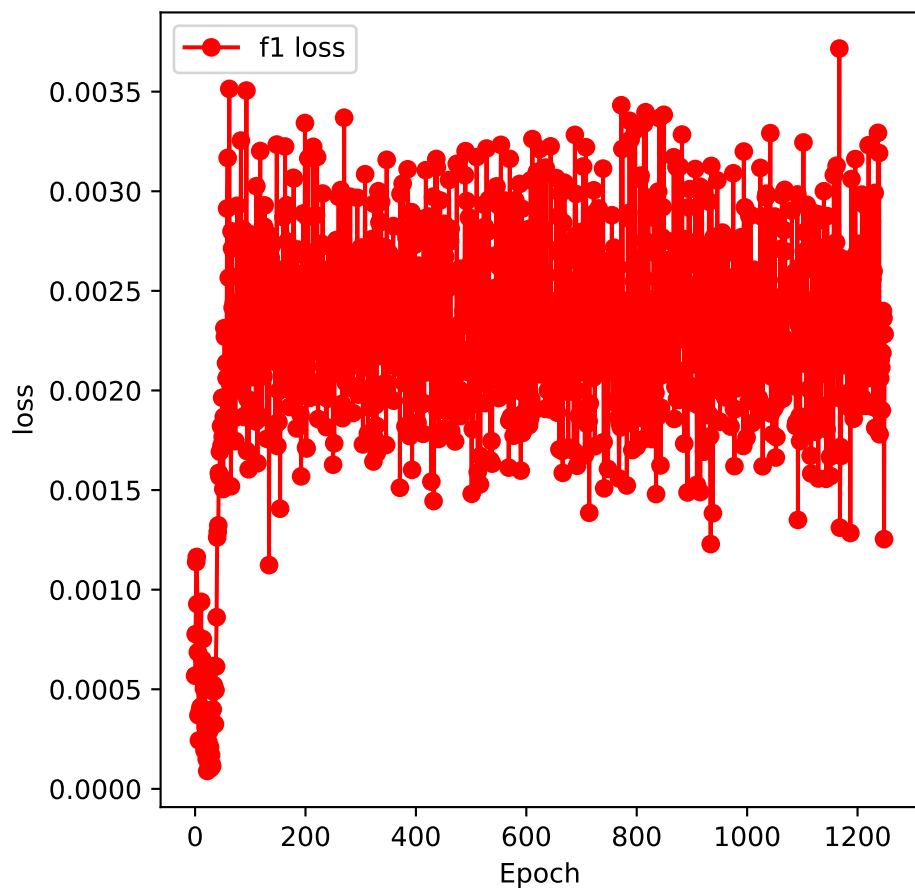

f2 loss

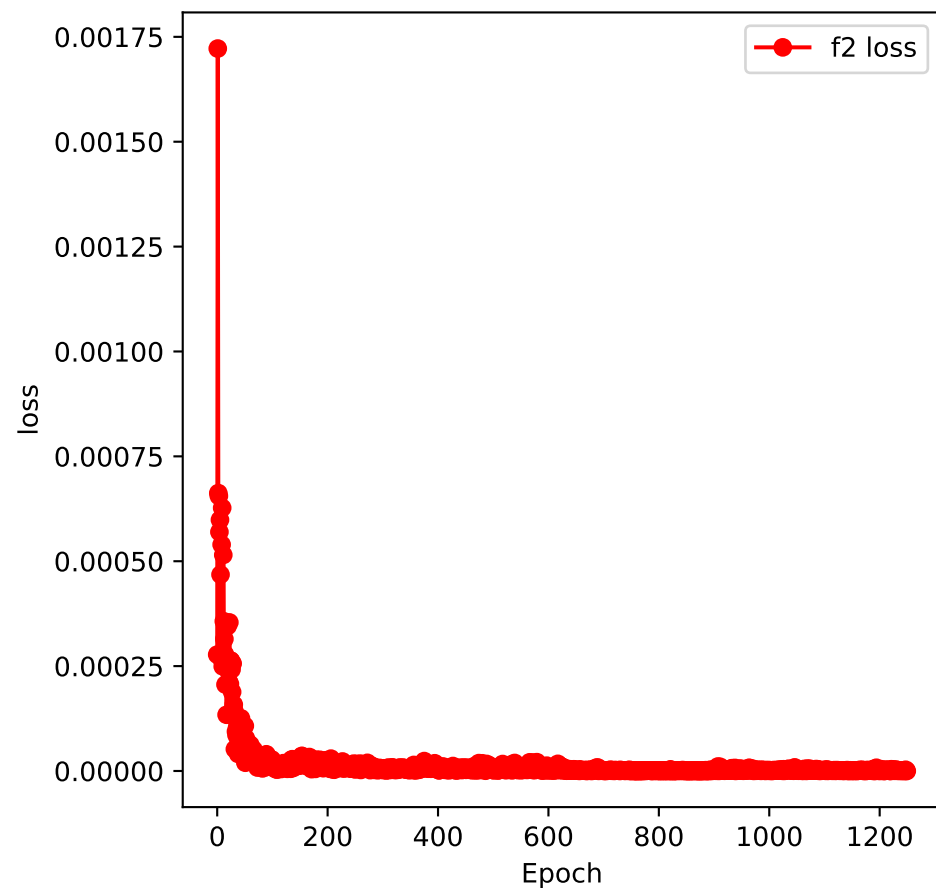

Supplement: supplementary_material [file llm_2s_exp0.008_losses.pdf › home/joseph/flo/EE_synthetic/figures/llm_2s_exp0.008_losses.pdf]

f1

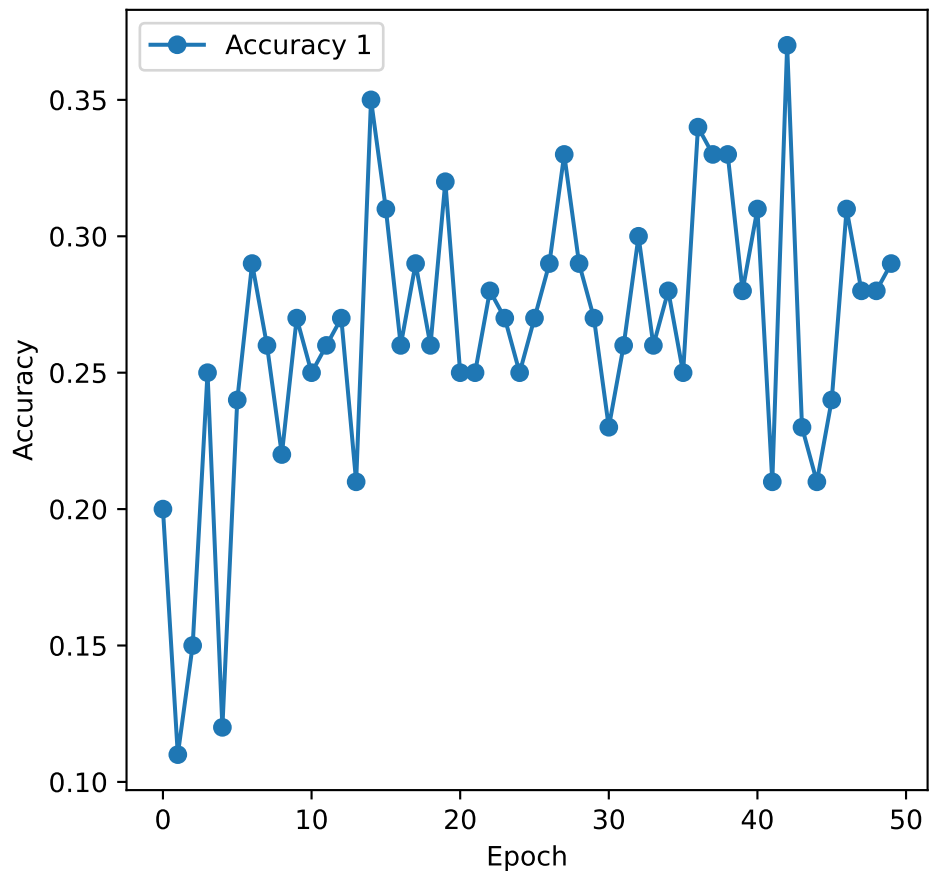

f2

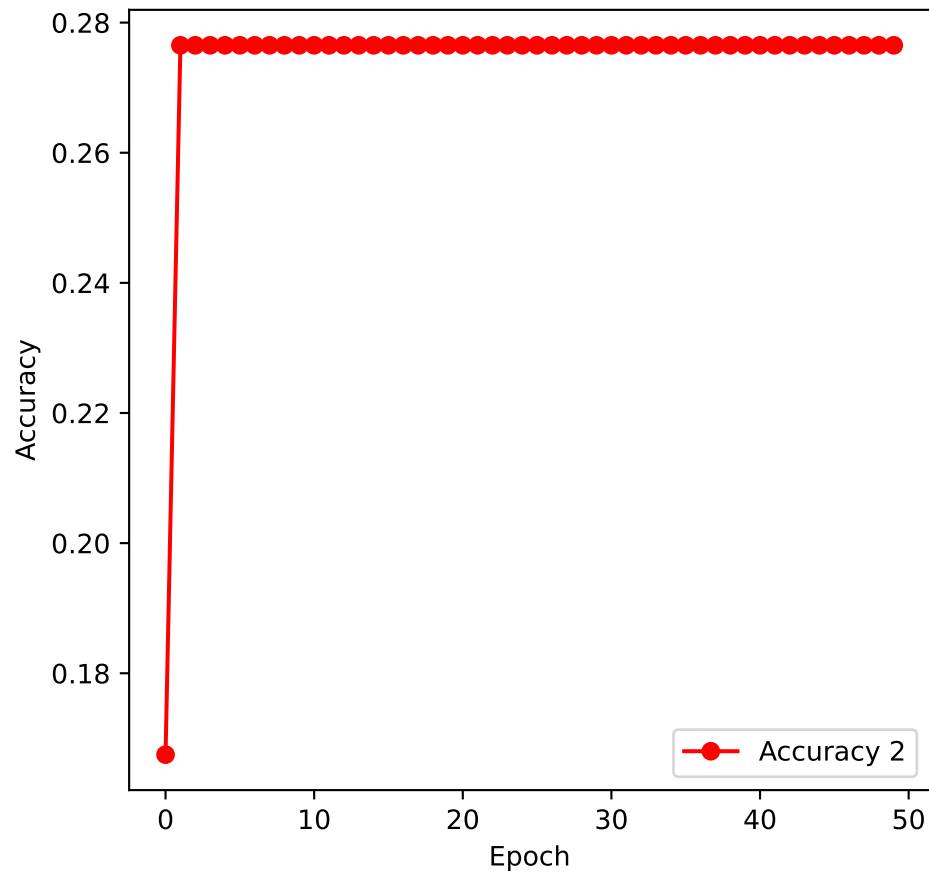

Supplement: supplementary_material [file llm_2s_exp0.009000000000000001_acc.pdf › home/joseph/flo/EE_synthetic/figures/llm_2s_exp0.009000000000000001_acc.pdf]

surrogate loss

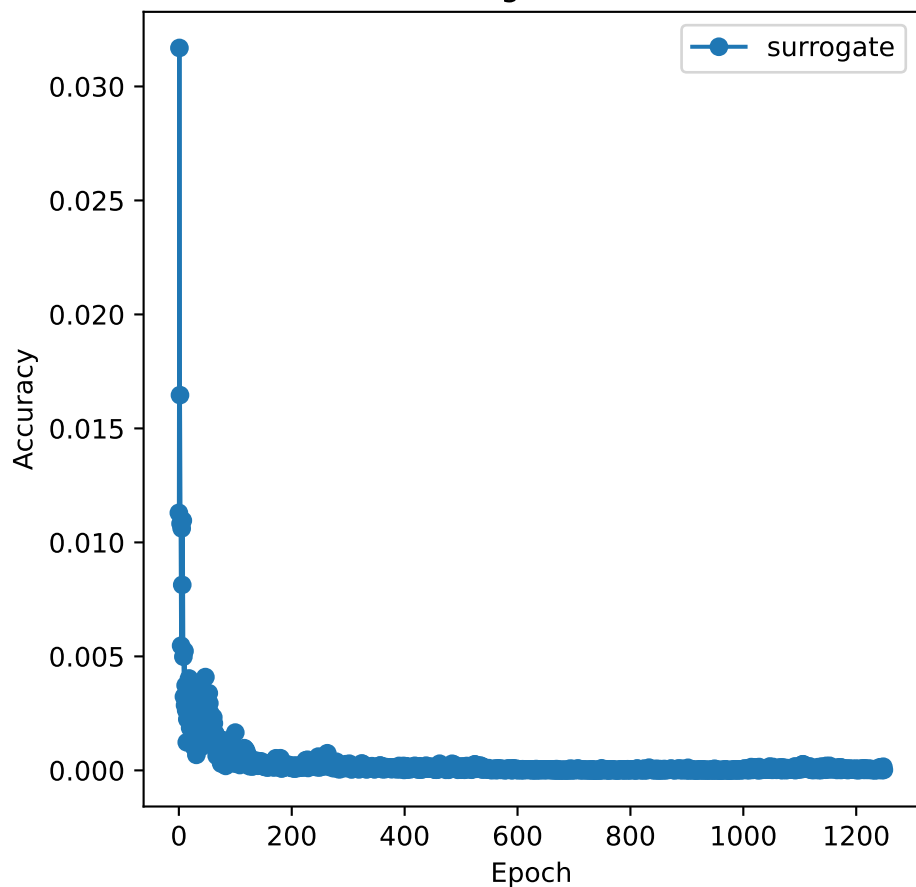

l01c on decision rule

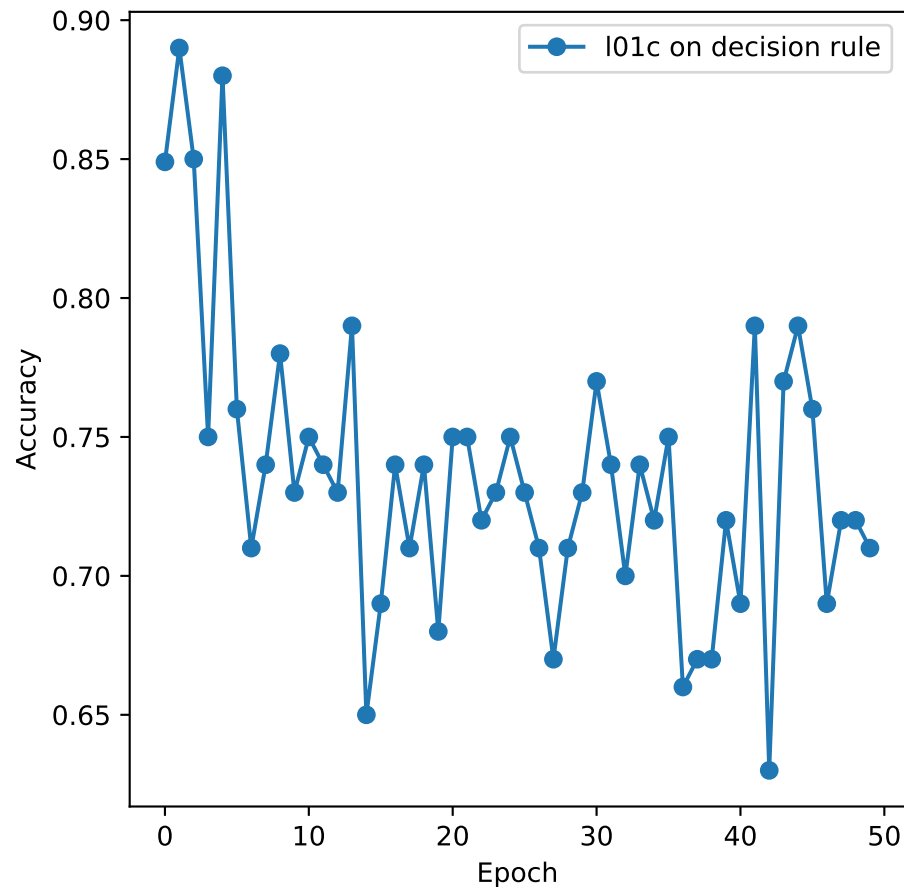

f1 loss

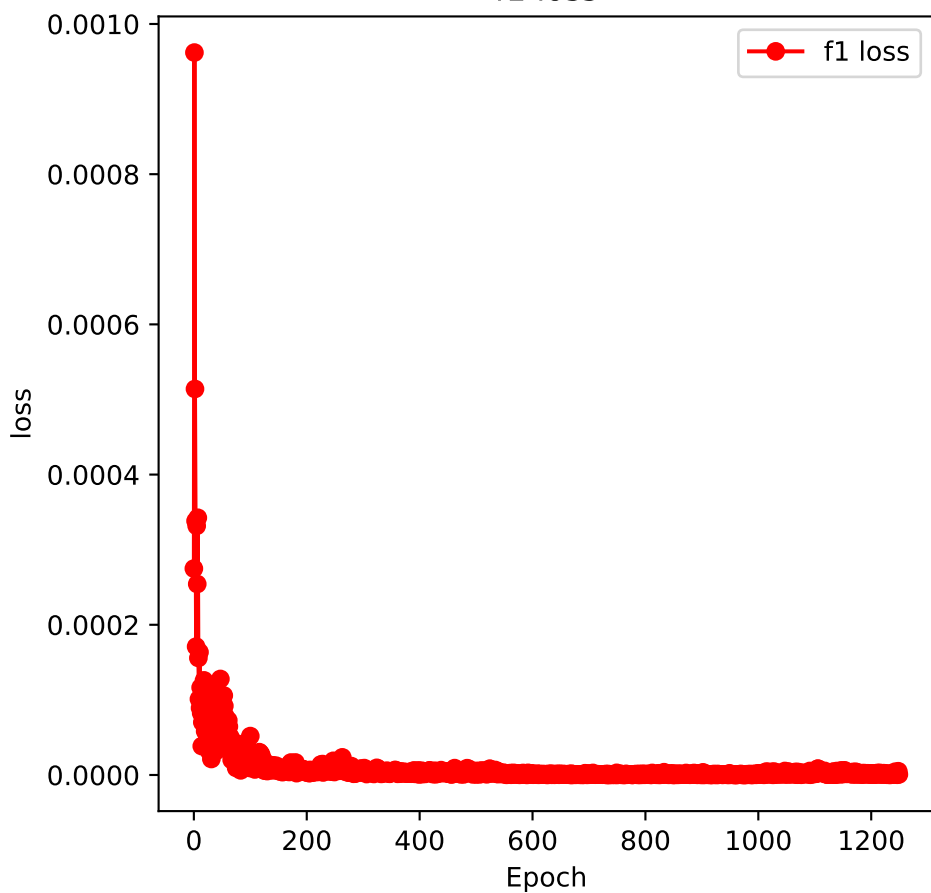

f2 loss

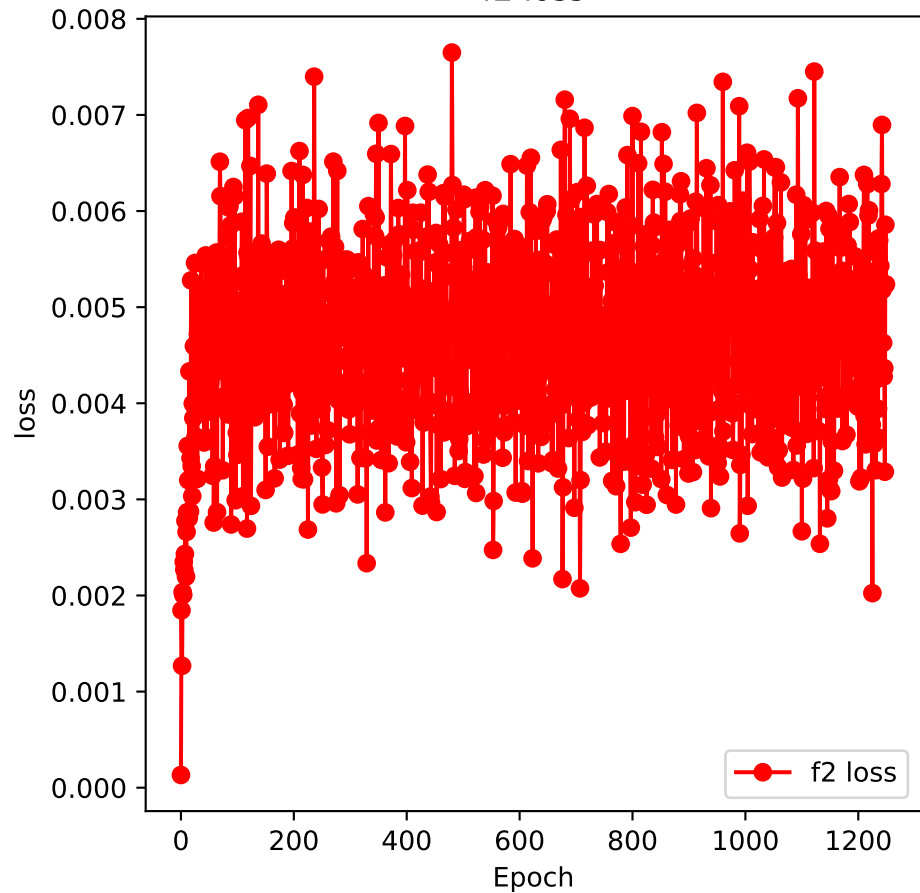

Supplement: supplementary_material [file llm_2s_exp0.009000000000000001_losses.pdf › home/joseph/flo/EE_synthetic/figures/llm_2s_exp0.009000000000000001_losses.pdf]
